# Supplementary material for: Neighbourhood greenspace and physical activity and sedentary behaviour among older adults with a recent diagnosis of type 2 diabetes: a prospective analysis
Source: PubMed Central journal article supplement — BMJ Open. 2019 Nov 14;9(11):e028947. doi: 10.1136/bmjopen-2019-028947 (PMC6886939; doi:10.1136/bmjopen-2019-028947), 2019-11-14
Supplement: bmjopen-2019-028947.draft_revisions.pdf [file bmjopen-2019-028947.draft_revisions.pdf]

# BMJ Open

BMJ Open is committed to open peer review. As part of this commitment we make the peer review history of every article we publish publicly available.

When an article is published we post the peer reviewers' comments and the authors' responses online. We also post the versions of the paper that were used during peer review. These are the versions that the peer review comments apply to.

The versions of the paper that follow are the versions that were submitted during the peer review process. They are not the versions of record or the final published versions. They should not be cited or distributed as the published version of this manuscript.

BMJ Open is an open access journal and the full, final, typeset and author-corrected version of record of the manuscript is available on our site with no access controls, subscription charges or pay-per-view fees (<http://bmjopen.bmj.com>).

If you have any questions on BMJ Open's open peer review process please email [info.bmjopen@bmj.com](mailto:info.bmjopen@bmj.com)

# BMJ Open

## Neighbourhood greenspace and physical activity and sedentary behaviour among older adults with a recent diagnosis of type 2 diabetes: A Prospective analysis

|                               |                                                                                                                                                                                                                                                                                                                                                                                                                                                      |
|-------------------------------|------------------------------------------------------------------------------------------------------------------------------------------------------------------------------------------------------------------------------------------------------------------------------------------------------------------------------------------------------------------------------------------------------------------------------------------------------|
| Journal:                      | <i>BMJ Open</i>                                                                                                                                                                                                                                                                                                                                                                                                                                      |
| Manuscript ID                 | bmjopen-2019-028947                                                                                                                                                                                                                                                                                                                                                                                                                                  |
| Article Type:                 | Research                                                                                                                                                                                                                                                                                                                                                                                                                                             |
| Date Submitted by the Author: | 03-Mar-2019                                                                                                                                                                                                                                                                                                                                                                                                                                          |
| Complete List of Authors:     | Chong, Shanley; South Western Sydney Local Health District; University of New South Wales, Western Sydney Clinical School<br>Mazumdar, Soumya; South Western Sydney Local Health District<br>Ding, Ding; University of Sydney<br>Morgan, Geoff; University of Sydney<br>Comino, Elizabeth; University of New South Wales<br>Bauman, Adrian; University of Sydney<br>Jalaludin, Bin; South Western Sydney Local Health District; University of Sydney |
| Keywords:                     | physical activity, diabetes, green space                                                                                                                                                                                                                                                                                                                                                                                                             |
|                               |                                                                                                                                                                                                                                                                                                                                                                                                                                                      |

SCHOLARONE™  
Manuscripts

1  
2  
3 1 Full title: Neighbourhood greenspace and physical activity and sedentary behaviour  
4  
5 2 among older adults with a recent diagnosis of type 2 diabetes: A Prospective  
6  
7 3 analysis  
8  
9

10 4  
11  
12  
13 5 Shanley Chong, PhD  
14  
15

16 6 Affiliation: Population Health Intelligence, Healthy People & Places Unit Population  
17  
18 7 Health, South Western Sydney Local Health District, New South Wales, Australia.  
19  
20  
21 8 South Western Sydney Clinical School, University of New South Wales, New South  
22  
23 9 Wales, Australia.  
24  
25

26 10  
27  
28  
29 11 Soumya Mazumdar, PhD  
30  
31

32 12 Affiliation: Population Health Intelligence, Healthy People & Places Unit Population  
33  
34 13 Health, South Western Sydney Local Health District, New South Wales, Australia.  
35  
36  
37 14 South Western Sydney Clinical School, University of New South Wales, New South  
38  
39 15 Wales, Australia.  
40  
41

42 16  
43  
44  
45 17 Ding Ding, PhD  
46  
47

48 18 Affiliation: Prevention Research Collaboration, Sydney School of Public Health,  
49  
50 19 University of Sydney, Camperdown, New South Wales, Australia.  
51

52  
53 20 Charles Perkins Centre, University of Sydney, Camperdown, New South Wales,  
54  
55 21 Australia.  
56

57  
58 22 Geoff Morgan, PhD  
59  
60

1  
2  
3 23 Affiliation: University Centre for Rural Health, School of Public Health, University of  
4  
5 24 Sydney, New South Wales, Australia.  
6  
7

8 25

9  
10  
11 26 Elizabeth Comino, Phd

12  
13  
14 27 Ingham Institute Applied Medical Research Liverpool BC, New South Wales,  
15  
16 28 Australia.

17  
18  
19 29 Centre for Health, Equity, Training, Research and Evaluation (CHETRE), University  
20  
21 30 of New South Wales, New South Wales, Australia.

22  
23  
24 31 Australia Research Centre for Primary Health Care and Equity, A Unit of Population  
25  
26 32 Health, South Western Sydney Local Health District, NSW Health Sydney, New  
27  
28 33 South Wales, Australia.

29  
30  
31 34  
32  
33  
34 35 Adrian Bauman, Phd

35  
36  
37 36 Affiliation: Prevention Research Collaboration, Sydney School of Public Health,  
38  
39 37 University of Sydney, Camperdown, New South Wales, Australia.

40  
41  
42 38 Charles Perkins Centre, University of Sydney, Camperdown, New South Wales,  
43  
44 39 Australia.

45  
46  
47 40

48  
49  
50 41 Bin Jalaludin, Phd

51  
52  
53 42 Affiliation: Population Health Intelligence, Healthy People & Places Unit Population  
54  
55 43 Health, South Western Sydney Local Health District, New South Wales, Australia.  
56  
57  
58  
59  
60

1  
2  
3  
4  
5  
6  
7  
8  
9  
10  
11  
12  
13  
14  
15  
16  
17  
18  
19  
20  
21  
22  
23  
24  
25  
26  
27  
28  
29  
30  
31  
32  
33  
34  
35  
36  
37  
38  
39  
40  
41  
42  
43  
44  
45  
46  
47  
48  
49  
50  
51  
52  
53  
54  
55  
56  
57  
58  
59  
60

44 School of Public Health and Community Medicine, University of New South Wales,  
45 New South Wales, Australia.

46

47 Corresponding author:

48 Bin Jalaludin

49 Locked Bag 7279, LIVERPOOL NSW 1871, Australia

50 Tel: +61287386093

51 Fax: +61287386884

52 Email: [shanely.chong@health.nsw.gov.au](mailto:shanely.chong@health.nsw.gov.au)

53

54

55

56

57

58

59

60

61

62

63

64

For peer review only

1  
2  
3 65 Abstract  
4  
5

6 66 Objectives:  
7

8  
9 67 Regular physical activity can reduce the risk of complications and mortality among  
10  
11 68 people with type 2 diabetes. Greenspace is one of the important factors that can  
12  
13 69 promote an active lifestyle. The aim of this study was to investigate the association  
14  
15 70 between access to greenspace and changes in physical activity and sedentary  
16  
17 71 behaviour among people with newly diagnosed T2D.  
18  
19

20  
21 72 Design: Prospective cohort.  
22

23  
24 73 Setting: New South Wales, Australia  
25

26 74 Methods:  
27

28  
29 75 We used self-reported information from the New South Wales 45 and Up Study  
30  
31 76 (baseline) and a follow-up study. Information on sitting, walking and moderate to  
32  
33 77 vigorous physical activity was used as outcomes. The proportion of greenspace  
34  
35 78 within 500m, 1km and 2km road network buffers around participant's residential  
36  
37 79 address was generated as a proxy measure for access to greenspace. The  
38  
39 80 association between the access to greenspace and the outcomes were explored  
40  
41 81 among the newly diagnosed T2D group and those without T2D.  
42  
43  
44

45  
46 82 Results:  
47

48  
49 83 Of the 18,094 participants, 1.4% reported type 2 diabetes in the follow-up survey but  
50  
51 84 not in the baseline survey (New type 2 diabetes) whereas 98.6% participants did not  
52  
53 85 report type 2 diabetes at both baseline and follow-up. Among New type 2 diabetes,  
54  
55 86 although no significant changes were found in the amount of walking with the  
56  
57 87 percentage of greenspace, increasing trends were apparent. There was a significant  
58  
59 88 association between the percentage of greenspace within 2km buffer and changes in  
60

1  
2  
3 89 amount of MVPA. Among No type 2 diabetes, the changes in amount of MVPA and  
4  
5 90 walking remained fairly stable with increasing percentage of greenspace. For  
6  
7  
8 91 changes in sitting time, there were no significant associations with percentage of  
9  
10 92 greenspace regardless of buffer size.  
11  
12

13 93

14  
15 94 Conclusions:16  
17 95 This study indicates that neighbourhood greenspace is related to active lifestyles  
18  
19 96 only to a very limited extent among people with newly diagnosed type 2 diabetes.  
20  
21

22 97

23  
24  
25 98 Strengths and Limitations of this study

- 26
- 
- 27
- 
- 28 99 • This is the first study to explore environmental influences on the behaviours of
- 
- 29
- 
- 30 100 people who transition into living with type 2 diabetes.
- 
- 31
- 
- 32 101 • Other strength of this study include a prospective design and a large
- 
- 33
- 
- 34 102 population-based cohort study.
- 
- 35
- 
- 36 103 • Change in duration of physical activity and sitting were calculated from self-
- 
- 37
- 
- 38 104 reported survey, at two time points.
- 
- 39
- 
- 40
- 
- 41

42 105

43 106

44 107

45 108

46 109

47 110

48 111

1  
2  
3 112  
4  
5  
6 113 Introduction  
7  
8  
9 114 Type 2 diabetes is a lifelong condition and is associated with increased risk for  
10  
11 115 cardiovascular, renal disease<sup>1</sup> and mortality.<sup>2,3</sup> A healthy lifestyle that includes, for  
12  
13 116 example regular physical activity, can help maintain healthy blood glucose levels and  
14  
15 117 reduce the risk of complications of type 2 diabetes.<sup>4-7</sup> However, only about half of  
16  
17 118 Australians with diabetes achieve adequate control of their blood glucose level.<sup>3</sup>  
18  
19  
20 119  
21  
22  
23 120 It is recommended that adults, including those diagnosed with type 2 diabetes  
24  
25 121 engage in at least 30 minutes of physical activity every day.<sup>8</sup> In a population-based  
26  
27 122 study in Australia, participants with incident type 2 diabetes reported lack of changes  
28  
29 123 in their walking and moderate to vigorous physical activity (MVPA) after their  
30  
31 124 diagnosis. Studies reported that 60% of people aged 35-64 years with diabetes  
32  
33 125 (types 1 and 2) were not achieving the recommended level of physical activity,<sup>9</sup> one  
34  
35 126 third of adults with type 2 diabetes were completely inactive<sup>10</sup> and only a third  
36  
37 127 exercised on regular basis.<sup>10</sup> Physical activity behaviour is determined by a range of  
38  
39 128 biological, psychosocial and environmental factors.<sup>11</sup> Built environment attributes  
40  
41 129 are frequently found to be associated with physical activity,<sup>12</sup> and activity-unfriendly  
42  
43 130 environments may be associated with higher type 2 diabetes incidence.<sup>13</sup> For  
44  
45 131 example, a study reported that one of the barriers among inactive patients with  
46  
47 132 diabetes (both type 1 and 2) was lack of local facilities.<sup>14</sup>  
48  
49  
50  
51  
52  
53 133  
54  
55  
56 134 One environmental attribute that plays an important role in physical activity is  
57  
58 135 greenspace.<sup>15-17</sup> Greenspace is defined as any vegetated land adjoining an urban  
59  
60



1  
2  
3 136 area which includes bushland, nature reserves, national parks, outdoor sports fields,  
4  
5 137 school playgrounds and rural or semi-rural areas immediately adjoining an urban  
6  
7  
8 138 area.<sup>18</sup> Several studies have found that people who have better access to parks and  
9  
10 139 green spaces are more likely to report that they engage in physical activity.<sup>19 20</sup> The  
11  
12 140 potential mechanism for these associations may be that greenspace prompts,  
13  
14 141 facilitates, and reinforces location-specific physical activity,<sup>21</sup> while simultaneously  
15  
16 142 discouraging sedentary lifestyles . Thus, greener surroundings may be a motivating  
17  
18 143 factor among people with newly diagnosed diabetes to engage in more physical  
19  
20 144 activity. Given that diagnosis of type 2 diabetes may serve as a window opportunity  
21  
22 145 for behavioural modification,<sup>22 23</sup> we hypothesise that the association between  
23  
24 146 neighbourhood greens pace and physical activity among people with newly  
25  
26 147 diagnosed type 2 diabetes may be greater than those never diagnosed with type 2  
27  
28 148 diabetes.

29  
30  
31  
32  
33 149  
34  
35  
36 150 Using data from a large cohort study in New South Wales (NSW), Australia, we  
37  
38 151 aimed to 1) investigate the associations between the access to neighbourhood  
39  
40 152 greenspace and changes in physical activity and sitting time in this large population-  
41  
42 153 based sample; and 2) examine whether the associations differed by type 2 diabetes  
43  
44 154 diagnosis status.

45  
46  
47  
48 155

## 49 156 Materials and Method

### 50 157 Study population

51  
52  
53  
54 158 The study area was the Sydney Statistical Division which has a population of  
55  
56 159 approximately 4.12 million people and covers an area of 12,428 square kilometres. It  
57  
58  
59  
60

1  
2  
3 160 is the largest urban agglomeration in Australia, with a wide range of environmental  
4  
5 161 features and diverse sociodemographic characteristics.  
6  
7  
8 162 Information about physical activity and relevant covariates at the individual level was  
9  
10 163 obtained from the baseline 45 and Up Study and the Social, Economic and  
11  
12 164 Environmental Factors (SEEF) follow-up Study. The 45 and Up Study is a  
13  
14 165 population-based cohort survey of NSW residents aged 45 years and older.  
15  
16 166 Recruitment was undertaken between 2006 and 2009. Potential participants were  
17  
18 167 randomly selected from the Medicare Australia database (Australia's universal public  
19  
20 168 health insurance system). Participants joined the study by completing a mailed self-  
21  
22 169 administered questionnaire and providing consent for long-term follow-up, including  
23  
24 170 linkage to various personal health records. The full study cohort consists of 267,153  
25  
26 171 people aged 45 years or older at the time of recruitment. The response rate was  
27  
28 172 18% and participants comprised 11% of the NSW population aged 45 years and  
29  
30 173 over.<sup>24</sup>  
31  
32  
33  
34  
35  
36  
37  
38

39 175 In 2010, the SEEF Study questionnaire was distributed to the first 100,000  
40  
41 176 participants of the 45 and Up Study, of whom 60,404 returned the completed  
42  
43 177 questionnaire. The average follow-up period was  $3.3 \pm 0.9$  years (median=2.8 years,  
44  
45 178 range=1.7-5.1 years, inter-quartile range=2.6 to 4.6 years). Questionnaires for both  
46  
47 179 the 45 and Up and the SEEF Study are available from the Sax Institute website<sup>25</sup>. Of  
48  
49 180 the 60,404 participants, 24,220 resided in the study area at the time of the baseline  
50  
51 181 45 and Up Study.  
52  
53  
54  
55

56 182  
57  
58  
59  
60

1  
2  
3 183 The baseline 45 and Up and the SEEF Study were approved by the University of  
4  
5 184 New South Wales Human Research Ethics Committee and the University of Sydney  
6  
7  
8 185 Human Research Ethics Committee respectively.  
9

## 10 186 Measures

### 11 187 *Exposure: access to greenspace*

12  
13  
14  
15  
16 188 We used the percentage of greenspace within 500m, 1km and 2km polygon-based  
17  
18 189 road network (PBRN) buffers around participants' residences (available for the  
19  
20  
21 190 baseline survey only) as proxies for geographic access to greenspace. These buffer  
22  
23 191 sizes were chosen as they are considered as walkable distance.<sup>26</sup>  
24  
25

26 192

27  
28 193 Greenspace data was obtained from StreetPro (PitneyBowers Inc., USA). In this  
29  
30 194 dataset, greenspace includes national parks, nature reserves, historic sites, state  
31  
32 195 forests, State recreation areas, wildlife refuges, conservation parks, protected areas,  
33  
34 196 wildlife reserves, urban recreation parks and other urban greenspaces. The PBRN  
35  
36  
37 197 buffers were created using the StreetPro Navigation (PitneyBowers Inc., USA) road  
38  
39 198 network file and ArcGIS network analyst to calculate the endpoints of all possible  
40  
41 199 routes up to the specified distance (500m, 1km and 2km) along the road network for  
42  
43  
44 200 each participant's residence. The endpoints were then connected to form irregular  
45  
46 201 polygons. Percentage of greenspace within PBRN buffers were categorised into 0-  
47  
48 202 5%, >5-10%, >10-15%, >15-20% and >20%. We combined >15-20% and >20% for  
49  
50  
51 203 greenspace within 500m buffers due to the small sample sizes.  
52

53 204

### 54 205 *Outcomes: sitting and physical activity*

55  
56  
57  
58  
59  
60

1  
2  
3 206 Information on sitting (hours per week), walking (minutes per week) and MVPA  
4  
5 207 (minutes per week) was collected in both surveys. Duration of sitting was adapted  
6  
7 208 from the International Physical Activity Questionnaire which has acceptable  
8  
9 209 reliability<sup>27</sup> and validity.<sup>27</sup> Physical activity was assessed using the Active Australia  
10  
11 210 Survey<sup>28</sup> which also has acceptable reliability<sup>29</sup> and validity.<sup>30</sup> In this instrument,  
12  
13 211 walking is defined as walking for recreation or exercise or to get to or from places.  
14  
15 212 Vigorous physical activity refers to any activity that causes a participant to breathe  
16  
17 213 harder or puff and pant. Moderate physical activity refers to less intense activities  
18  
19 214 such as gentle swimming, social tennis, vigorous gardening or work around the  
20  
21 215 house. Total weighted minutes of MVPA per week is calculated by the sum of  
22  
23 216 minutes of walking, moderate physical activity and twice the minutes of vigorous  
24  
25 217 physical activity.<sup>29</sup> Reported time spent on walking and MVPA greater than 14 hours  
26  
27 218 per day was considered as an impossible value and recoded to 14 hours.<sup>31</sup> We  
28  
29 219 conceptualised walking and total MVPA as two separate outcomes because walking  
30  
31 220 is expected to be more specifically related to neighbourhood greenspace while total  
32  
33 221 MVPA is commonly used as a measure of overall levels of health-enhancing physical  
34  
35 222 activity.  
36  
37  
38  
39  
40  
41  
42  
43  
44  
45

#### 224 *Moderator: type 2 diabetes diagnosis*

46  
47  
48 225 New cases of type 2 diabetes were defined as those participants who did not report  
49  
50 226 T2D at the baseline survey but reported type 2 diabetes at the follow-up survey (New  
51  
52 227 type 2 diabetes). The comparator group was participants who did not report type 2  
53  
54 228 diabetes at both baseline and follow-up surveys (No type 2 diabetes). The questions  
55  
56 229 asked to determine a diagnosis of type 2 diabetes at the baseline survey were “Has  
57  
58  
59  
60

1  
2  
3 230 a doctor ever told you that you have diabetes” and “Have you taken Diabex,  
4  
5 231 Diaformin, Metformin for most of the last 4 weeks”.  
6  
7  
8 232  
9  
10  
11 233 Participants who reported that they had been told by a doctor that they had diabetes  
12  
13 234 were then also asked about their age at diagnosis. For participants with newly  
14  
15 235 diagnosed type 2 diabetes, the time lapse since diagnosis to completion of the SEEF  
16  
17 236 Study questionnaire was also calculated (age at time of completion of SEEF Study  
18  
19 237 questionnaire minus age at type 2 diabetes diagnosis). Self-reported diagnosis of  
20  
21 238 type 2 diabetes in the 45 and Up Study has high sensitivity (83.7%) and specificity  
22  
23 239 (97.7%) compared to administrative hospitalisation data <sup>32</sup>.  
24  
25  
26  
27  
28 240

#### 241 *Covariates*

242 Participant reported socio-demographic characteristics, including age, gender,  
243 country of birth (English speaking countries, Europe, Middle-East, Asia, Other) and  
244 body mass index (BMI) were included as covariates in the regression models. We  
245 also included physical functioning (measured using the Medical Outcomes Study  
246 (MOS) Physical Functioning Scale; it ranges from 0 to 100 and was categorised into  
247 no limitation (100), minor limitation (95-99), moderate limitation (85-94), or severe  
248 limitation (0-84)) <sup>33</sup>, psychological distress (Kessler-10 (K10); a K10 score of  $\geq 22$   
249 reflects high or very high psychological distress<sup>34</sup>) and an area-level deprivation  
250 score as covariates in the model. Area-level deprivation was measured by 2006  
251 Index of Relative Socio-Economic Disadvantage (IRSED) quintiles at the postcode  
252 level. The IRSED was created by the Australian Bureau of Statistics to compare  
253 social and economic disadvantage across geographical areas in Australia. The index

1  
2  
3 254 is derived from the 2006 Census variables such as income, educational attainment,  
4  
5 255 unemployment, and people working in unskilled occupations<sup>35</sup>.  
6  
7

8 256  
9

10  
11 257  
12

13  
14 258  
15

16  
17 259 *Statistical analysis*  
18

19 260 The Kruskal-Wallis test was used to compare continuous baseline lifestyle variables  
20  
21 261 between type 2 diabetes groups. Separate multivariate linear regression models  
22  
23 262 were used to examine the association between greenspace access and change in  
24  
25 263 outcome variables (in MVPA, walking, and sitting). Only statistically significant  
26  
27 264 variables from univariate regression analyses were included in the final model to  
28  
29 265 account for any potential confounding. These variables were age, gender,  
30  
31 266 educational attainment, level of physical functional limitation, IRSED, BMI, duration  
32  
33 267 of type 2 diabetes diagnosis (New type 2 diabetes group only), follow-up time and  
34  
35 268 the baseline value of each outcome in specific models. To examine whether the  
36  
37 269 association between greenspace and change in outcome variables modified by the  
38  
39 270 presence of type 2 diabetes, a one-way interaction between the status of type 2  
40  
41 271 diabetes (New type 2 diabetes and No type 2 diabetes) and percentage of  
42  
43 272 greenspace was explored. We then developed regression models, stratified by the  
44  
45 273 presence of type 2 diabetes. Actual change values (i.e. marginal means) and  
46  
47 274 associated 95% confidence intervals (CIs) were reported. Statistical analyses were  
48  
49 275 conducted using SAS version 9.4 (SAS Institute, Cary, NC).  
50  
51  
52  
53  
54  
55  
56  
57  
58  
59  
60

1  
2  
3 277 Considering that neighbourhood safety is a premise to walking despite access to  
4  
5 278 greenspace, for the walking outcome, we performed a sensitivity analysis by  
6  
7  
8 279 neighbourhood safety. Perception of neighbourhood safety was only asked at the  
9  
10 280 follow-up survey using the following questions: “Does your area have a reputation for  
11  
12 281 being a safe place?” and “The crime rate in my neighbourhood makes it unsafe to go  
13  
14 282 on walks during the day”. For the second question, the responses were classified as  
15  
16 283 strongly agree/agree and disagree/strongly disagree. Due to the small number of  
17  
18 284 responses for the sensitivity analysis, percentage of greenspace of >10-15%, >15-  
19  
20 285 20% and >20% were combined into >10%.  
21  
22  
23  
24 286

## 26 287 Results

28 288 Of the 24,220 participants living in Sydney Statistical Division, 628 were excluded  
29  
30 289 due to inconsistent reporting between baseline and follow-up surveys, 1,498 were  
31  
32 290 excluded due to reporting type 2 diabetes at both baseline and follow-up and an  
33  
34 291 additional 4,000 were excluded because of severe level of physical function, making  
35  
36 292 physical activity challenging or infeasible, leaving 18,094 participants in the analytical  
37  
38 293 sample (Figure 1).  
39  
40  
41  
42  
43

### 44 294 Figure 1: Flow chart of sample selection

45 295  
46  
47  
48 296 Of the 18,094 participants, 260 (1.4%) reported type 2 diabetes in the follow-up  
49  
50 297 survey but not in the baseline survey (New type 2 diabetes) whereas 17,834 (98.6%)  
51  
52 298 participants did not report type 2 diabetes at both baseline and follow-up (No type 2  
53  
54 299 diabetes). The average duration of time since diagnosis was  $1.8 \pm 1.1$  years  
55  
56 300 (median=1.7 years). More than half of all the participants were female (52.0%) and  
57  
58 301 the average age of participants was  $59.5 \pm 9.6$  years. The majority of participants  
59  
60



302 were born in an English speaking country (85.2%) and about one-quarter had not  
303 completed high school education (Table 1).

304 Table 1 shows changes in outcome variables at follow-up by baseline  
305 sociodemographic characteristics and access to greenspace. There were significant  
306 associations of age group, IRSED, physical functional limitation, BMI, with change in  
307 the amount of walking and MVPA. Significant associations were also found between  
308 gender and change in the amount of walking and sitting. Educational attainment was  
309 significantly associated with a change in sitting time. There were no significant  
310 associations between greenspace and changes in MVPA, walking and sitting.

311 Table 1: Changes in outcome variables at follow-up by baseline characteristics

|                                                    | n      | Change in MVPA <sup>1</sup><br>(hours/week) |                |         | Change in walking <sup>2</sup><br>(hours/week) |               |         | Change in sitting <sup>3</sup><br>(hours/week) |                |         |
|----------------------------------------------------|--------|---------------------------------------------|----------------|---------|------------------------------------------------|---------------|---------|------------------------------------------------|----------------|---------|
|                                                    |        | Mean                                        | 95% CI         | p-value | Mean                                           | 95% CI        | p-value | Mean                                           | 95% CI         | p-value |
| Gender                                             |        |                                             |                | 0.072   |                                                |               | 0.018   |                                                |                | 0.013   |
| Male                                               | 8,677  | 0.20                                        | 0.04 to 0.37   |         | 0.14                                           | 0.07 to 0.21  |         | -0.47                                          | -0.53 to -0.40 |         |
| Female                                             | 9,417  | 0.42                                        | 0.25 to 0.59   |         | 0.27                                           | 0.19 to 0.34  |         | -0.59                                          | -0.65 to -0.52 |         |
| Age (years)                                        |        |                                             |                | <0.0001 |                                                |               | <0.0001 |                                                |                | <0.0001 |
| 45-55                                              | 6,581  | 0.19                                        | 0.01 to 0.38   |         | 0.07                                           | -0.01 to 0.15 |         | -0.17                                          | -0.24 to -0.10 |         |
| >55-65                                             | 5,960  | 0.76                                        | 0.56 to 0.96   |         | 0.38                                           | 0.30 to 0.47  |         | -0.72                                          | -0.80 to -0.64 |         |
| >65                                                | 5,553  | -0.12                                       | -0.36 to 0.12  |         | 0.17                                           | 0.06 to 0.27  |         | -0.86                                          | -0.95 to -0.77 |         |
| Country of birth (missing=146)                     |        |                                             |                | 0.082   |                                                |               | 0.164   |                                                |                | 0.27    |
| English speaking countries                         | 15,282 | 0.37                                        | 0.24 to 0.49   |         | 0.22                                           | 0.16 to 0.28  |         | -0.51                                          | -0.56 to -0.47 |         |
| Europe                                             | 1,213  | 0.12                                        | -0.37 to 0.61  |         | 0.21                                           | -0.01 to 0.42 |         | -0.66                                          | -0.85 to -0.48 |         |
| Middle East                                        | 192    | -0.18                                       | -1.43 to 1.07  |         | -0.30                                          | -0.85 to 0.24 |         | -0.87                                          | -1.34 to -0.39 |         |
| Asia                                               | 825    | -0.42                                       | -0.97 to 0.14  |         | 0.01                                           | -0.24 to 0.25 |         | -0.57                                          | -0.78 to -0.36 |         |
| Other                                              | 438    | 0.22                                        | -0.54 to 0.97  |         | 0.18                                           | -0.15 to 0.51 |         | -0.41                                          | -0.70 to -0.11 |         |
| Highest level of education completed (missing=206) |        |                                             |                | 0.496   |                                                |               | 0.158   |                                                |                | <0.0001 |
| University/TAFE <sup>5</sup>                       | 10,491 | 0.27                                        | 0.12 to 0.42   |         | 0.16                                           | 0.09 to 0.22  |         | -0.41                                          | -0.46 to -0.35 |         |
| High school                                        | 3,306  | 0.46                                        | 0.18 to 0.74   |         | 0.26                                           | 0.14 to 0.39  |         | -0.69                                          | -0.80 to -0.59 |         |
| Did not complete high school                       | 4,091  | 0.32                                        | 0.05 to 0.59   |         | 0.26                                           | 0.14 to 0.38  |         | -0.76                                          | -0.86 to -0.65 |         |
| IRSED                                              |        |                                             |                | 0.002   |                                                |               | 0.007   |                                                |                | 0.123   |
| Least disadvantaged group                          | 3,086  | 0.39                                        | 0.22 to 0.55   |         | 0.23                                           | 0.16 to 0.30  |         | -0.50                                          | -0.57 to -0.44 |         |
| 2 <sup>nd</sup> disadvantaged group                | 3,735  | -0.06                                       | -0.45 to 0.33  |         | 0.01                                           | -0.17 to 0.18 |         | -0.69                                          | -0.84 to -0.54 |         |
| 3 <sup>rd</sup> disadvantaged group                | 3,850  | -0.31                                       | -0.69 to 0.07  |         | 0.03                                           | -0.14 to 0.20 |         | -0.55                                          | -0.69 to -0.40 |         |
| 4 <sup>th</sup> disadvantaged group                | 3,691  | 0.51                                        | 0.28 to 0.74   |         | 0.30                                           | 0.20 to 0.41  |         | -0.49                                          | -0.57 to -0.40 |         |
| Most disadvantaged group                           | 3,732  | 0.37                                        | -0.16 to 0.89  |         | 0.10                                           | -0.13 to 0.33 |         | -0.64                                          | -0.84 to -0.44 |         |
| Physical functional limitation (missing=3,123)     |        |                                             |                | <0.0001 |                                                |               | <0.001  |                                                |                | 0.301   |
| Moderate                                           | 3,546  | -0.48                                       | -0.73 to -0.24 |         | 0.01                                           | -0.09 to 0.12 |         | -0.58                                          | -0.68 to -0.49 |         |
| Minor                                              | 3,768  | 0.10                                        | -0.13 to 0.33  |         | 0.21                                           | 0.11 to 0.32  |         | -0.53                                          | -0.62 to -0.44 |         |
| None                                               | 7,405  | 0.80                                        | 0.63 to 0.96   |         | 0.29                                           | 0.21 to 0.36  |         | -0.50                                          | -0.56 to -0.43 |         |
| Psychological distress (missing=355)               |        |                                             |                | 0.595   |                                                |               | 0.716   |                                                |                | 0.415   |
| No                                                 | 16,900 | 0.32                                        | 0.20 to 0.44   |         | 0.20                                           | 0.15 to 0.25  |         | -0.52                                          | -0.57 to -0.47 |         |
| Yes                                                | 812    | 0.16                                        | -0.43 to 0.74  |         | 0.25                                           | -0.01 to 0.51 |         | -0.62                                          | -0.85 to -0.39 |         |
| Body Mass Index (missing=857)                      |        |                                             |                | <0.0001 |                                                |               | <0.0001 |                                                |                | <0.0001 |



|                        |        |       |                |       |      |               |       |       |                |
|------------------------|--------|-------|----------------|-------|------|---------------|-------|-------|----------------|
| Under weight           | 244    | 0.30  | -0.74 to 1.34  |       | 0.20 | -0.26 to 0.66 |       | -0.54 | -0.94 to -0.14 |
| Acceptable weight      | 7,541  | 0.69  | 0.51 to 0.86   |       | 0.33 | 0.26 to 0.41  |       | -0.63 | -0.69 to -0.56 |
| Overweight             | 6,852  | 0.25  | 0.07 to 0.44   |       | 0.21 | 0.13 to 0.29  |       | -0.51 | -0.58 to -0.44 |
| Obese                  | 2,547  | -0.83 | -1.15 to -0.50 |       | 0.28 | 0.13 to 0.42  |       | -0.22 | -0.34 to -0.09 |
| Greenspace within 500m |        |       |                | 0.476 |      |               | 0.354 |       | 0.715          |
| 0-5%                   | 13,762 | 0.34  | 0.21 to 0.48   |       | 0.19 | 0.13 to 0.25  |       | -0.51 | -0.56 to -0.46 |
| >5-10%                 | 2,657  | 0.16  | -0.14 to 0.47  |       | 0.25 | 0.12 to 0.39  |       | -0.55 | -0.67 to -0.43 |
| >10-15%                | 1,341  | 0.19  | -0.24 to 0.63  |       | 0.23 | 0.03 to 0.42  |       | -0.61 | -0.78 to -0.44 |
| >15%                   | 334    | 0.61  | -0.26 to 1.49  |       | 0.28 | -0.11 to 0.66 |       | -0.50 | -0.83 to -0.17 |
| Greenspace within 1km  |        |       |                | 0.224 |      |               | 0.128 |       | 0.951          |
| 0-5%                   | 10,948 | 0.37  | 0.22 to 0.52   |       | 0.20 | 0.14 to 0.27  |       | -0.52 | -0.58 to -0.46 |
| >5-10%                 | 4,843  | 0.12  | -0.11 to 0.35  |       | 0.15 | 0.05 to 0.25  |       | -0.52 | -0.61 to -0.43 |
| >10-15%                | 1,497  | 0.29  | -0.13 to 0.70  |       | 0.31 | 0.13 to 0.49  |       | -0.59 | -0.75 to -0.43 |
| >15-20%                | 451    | 0.52  | -0.22 to 1.26  |       | 0.08 | -0.25 to 0.40 |       | -0.52 | -0.81 to -0.23 |
| >20%                   | 355    | 0.94  | 0.10 to 1.79   |       | 0.59 | 0.22 to 0.96  |       | -0.47 | -0.79 to -0.15 |
| Greenspace within 2km  |        |       |                | 0.477 |      |               | 0.682 |       | 0.221          |
| 0-5%                   | 7,789  | 0.33  | 0.15 to 0.51   |       | 0.16 | 0.08 to 0.24  |       | -0.55 | -0.62 to -0.48 |
| >5-10%                 | 6,980  | 0.21  | 0.02 to 0.40   |       | 0.23 | 0.15 to 0.32  |       | -0.50 | -0.57 to -0.43 |
| >10-15%                | 2,157  | 0.44  | 0.10 to 0.78   |       | 0.25 | 0.10 to 0.40  |       | -0.53 | -0.65 to -0.40 |
| >15-20%                | 688    | 0.46  | -0.14 to 1.06  |       | 0.14 | -0.13 to 0.40 |       | -0.36 | -0.59 to -0.13 |
| >20%                   | 480    | 0.75  | 0.03 to 1.48   |       | 0.36 | 0.04 to 0.68  |       | -0.77 | -1.04 to -0.49 |

312

### 313 Baseline correlates of the outcomes

314

315 Table 2 presents the outcome variables at baseline by type 2 diabetes group. The  
 316 amount of time spent on MVPA at baseline was significantly higher among the “No  
 317 type 2 diabetes” group. There were no significant differences in the amount of time  
 318 spent on walking and sitting between New type 2 diabetes and No type 2 diabetes.

319 Table 2: Outcome variables at baseline by type 2 diabetes status

|                         | New type 2 diabetes |      |                        | No type 2 diabetes |      |                        | Kruskal-Wallis,<br>p-value |
|-------------------------|---------------------|------|------------------------|--------------------|------|------------------------|----------------------------|
|                         | Median              | Mean | Interquartile<br>range | Median             | Mean | Interquartile<br>range |                            |
| MVPA (hours/week)       | 6.00                | 8.13 | 2.52-11.67             | 7.25               | 9.13 | 3.67-13.00             | 0.006                      |
| Walking<br>(hours/week) | 2.00                | 2.99 | 0.50-4.00              | 2.00               | 2.95 | 0.83-4.00              | 0.538                      |
| Sitting (hours/week)    | 5.00                | 5.90 | 4.00-8.00              | 5.00               | 5.83 | 4.00-8.00              | 0.534                      |

320

321 Although the interactions between access to greenspace and status of type 2  
 322 diabetes was not statistically significant for each outcome variable except for the  
 323 changes in MVPA with percentage of greenspace within 2km, the differences in  
 324 trends between status of type 2 diabetes were noted as shown in Figure 2.

1  
2  
3 325  
4  
56 326 Greenspace and outcomes by diagnosis of type 2 diabetes  
7

8  
9 327 Figure 2 presents marginal mean changes in the amount of walking, MVPA and  
10  
11 328 sitting, and associated 95% CI by proportion of greenspace. A change in the  
12  
13 329 outcome variable of greater than zero indicates an increase in that outcome at the  
14  
15 330 follow-up study relative to the baseline study. Regardless of diabetes status and  
16  
17 331 buffer size, there were no associations between percentage of greenspace and  
18  
19 332 changes in amount of walking and sitting. For example, the 95% CI of changes in the  
20  
21 333 amount of walking overlapped between each category of greenspace regardless of  
22  
23 334 buffer size. Although there were no significant changes in amount of walking with the  
24  
25 335 percentage of greenspace, increasing trends were apparent among New type 2  
26  
27 336 diabetes which peaked at >15-20% of greenspace, whereas fairly stable trends were  
28  
29 337 found among No type 2 diabetes. Similar trends were also found for changes in the  
30  
31 338 amount of MVPA.  
32  
33  
34  
35

36  
37 339  
38  
39

40 340 Among New type 2 diabetes, there was a significant association between the  
41  
42 341 percentage of greenspace within 2km buffer and changes in amount of MVPA. The  
43  
44 342 changes in MVPA at >15-20% of greenspace within 2km was significantly higher  
45  
46 343 than those with <15% of greenspace within 2km. Among No type 2 diabetes, the  
47  
48 344 changes in amount of MVPA remained fairly stable with increasing percentage of  
49  
50 345 greenspace (Figure 2).  
51  
52  
53

54  
55 346  
56  
57  
58  
59  
60

1  
2  
3 347 For changes in sitting time, there were no significant associations with percentage of  
4  
5 348 greenspace regardless of buffer size. Among New type 2 diabetes, the changes in  
6  
7 349 amount of sitting decreased at percentage of greenspace >10%. Among No type 2  
8  
9  
10 350 diabetes, the changes in amount of sitting significantly decreased at follow-up and  
11  
12 351 remained stable with increasing proportion of greenspace.  
13  
14

15 352  
16  
17

18 353  
19  
20

### 21 354 Sub-analysis

22  
23  
24 355 In the sensitivity analysis (Figure 3), in participants who perceived their  
25  
26 356 neighbourhood as safe, the association between percentage of greenspace and  
27  
28 357 changes in amount of walking remained non-significant regardless of the buffer size.  
29  
30 358 Increasing trends were apparent for percentage of greenspace within 1km and 2km  
31  
32 359 buffers. Among participants who perceived their neighbourhood as unsafe, the  
33  
34 360 association between percentage of greenspace and changes in amount of walking  
35  
36 361 also remain non-significant regardless of the buffer size. However, there were  
37  
38 362 decreasing trends of walking within 500m and 1km buffer sizes for people who  
39  
40 363 perceived their neighbourhood to be unsafe. The decreasing trend was less  
41  
42 364 pronounced within a 2km buffer size.  
43  
44  
45  
46  
47

48 365 Figure 2: Change (with 95% CI) in outcomes by proportion of greenspace  
49 366

50 367 Figure 3: Change in walking by percentage of greenspace<sup>1</sup> among New type 2  
51 368 diabetes by perception of neighbourhood safety  
52 369

### 53 54 55 370 Discussion 56 57 58 59 60

1  
2  
3 371 This is the first study to explore environmental influences on the behaviours of  
4  
5 372 people who transition into living with type 2 diabetes. Overall, we found that there  
6  
7 373 was a lack of association between access to greenspace at baseline and change in  
8  
9 374 walking, MVPA, and sitting time. We found no statistically significant interactions  
10  
11 375 between access to greenspace and status of type 2 diabetes for each outcome  
12  
13 376 variable, except for the changes in MVPA with percentage of greenspace within 2km.  
14  
15 377 Although no significant interactions were found, possibly due to the small sample  
16  
17 378 size of those with newly diagnosed type 2 diabetes, the magnitude of changes in  
18  
19 379 walking and MVPA increased as percentage of greenspace increased among New  
20  
21 380 T2D while remain fairly stable among No type 2 diabetes. There was no significant  
22  
23 381 association between greenspace and sitting time with fairly stable trends among both  
24  
25 382 New type 2 diabetes and No type 2 diabetes.  
26  
27  
28  
29  
30  
31  
32  
33

34 384 Among participants with newly diagnosed type 2 diabetes, there were gradual  
35  
36 385 increases in walking and MVPA with increasing proportion of greenspace within 1km  
37  
38 386 and 2km buffers. However, these increases in walking and MVPA were no longer  
39  
40 387 evident with >20% greenspace. This may be because around half of the participants  
41  
42 388 with more than 20% of greenspace within a 2km buffer (around 3% of the total  
43  
44 389 sample) live near larger greenspace (area > 1km<sup>2</sup>). These large greenspaces are  
45  
46 390 mainly national parks and nature reserve that may have limited public access points.  
47  
48 391 These areas are often located in suburbs on the outskirts of the city with minimal  
49  
50 392 pedestrian or other infrastructure to facilitate the regular use of greenspace for  
51  
52 393 physical activity. In this regard, the type and functionality of the greenspace may be  
53  
54 394 a salient factor in addition to quantity<sup>36</sup>.  
55  
56  
57  
58  
59  
60

1  
2  
3 395 Furthermore, the lack of association found between greenspace and walking and  
4  
5 396 MVPA may be due to the increased participation in fitness activities taken place  
6  
7 397 outside of neighbourhood greenspace. Such fitness activities include aerobics,  
8  
9  
10 398 fitness, gym activities, Pilates, weight training and yoga.<sup>37</sup> In Australia, fitness centre  
11  
12 399 /gym activities is the second most popular physical recreational activity after  
13  
14 400 walking.<sup>38</sup> Similarly, a Dutch study<sup>15</sup> found no significant association between the  
15  
16 401 amount of greenspace within 1km radius of respondents' home and meeting the  
17  
18 402 Dutch public health recommendation for physical activity possibly due to a high  
19  
20 403 density of fitness centres and so that access to greenspace is not a necessary  
21  
22 404 condition for being physically active.<sup>39</sup>  
23  
24  
25  
26 405

27  
28  
29 406 The weak associations between sitting and proportion of greenspace may be due to  
30  
31 407 the lack of detailed information on the setting and domains of sitting (home, car, work  
32  
33 408 or recreation environment). In the 45 and up study, only total sitting time was  
34  
35 409 measured at both baseline and follow-up. Self-reported total sitting time is subject to  
36  
37 410 substantial measurement errors and does not distinguish occupational and  
38  
39 411 transportation sitting from recreational sitting. Previous studies have found that  
40  
41 412 correlates of sitting differed considerably by domain of sitting.<sup>40</sup> Sperlich et al found  
42  
43 413 a weak association between sitting duration and access to parks and recreation  
44  
45 414 facilities<sup>41</sup> and suggest that research investigating association between sitting time  
46  
47 415 and environment should consider the diverse domains of sitting.<sup>41</sup>  
48  
49  
50  
51

52 416  
53  
54  
55 417 Overall, the association between proportion of greenspace and change in physical  
56  
57 418 activity appeared more prominent in New type 2 diabetes than No type 2 diabetes.  
58  
59 419 These findings suggest that greenspace may have more motivating effect on

1  
2  
3 420 physical activity among those newly diagnosed with type 2 diabetes. Diabetes  
4  
5 421 Australia recommends people with type 2 diabetes start with at least thirty minutes of  
6  
7 422 moderate physical activity every day or between sixty and ninety minutes every day  
8  
9 423 if they are trying to lose weight.<sup>42</sup> However, it appears that proximity to greenspace  
10  
11 424 alone may not be sufficient to meet Diabetes Australia recommendations for those  
12  
13 425 with newly diagnosed type 2 diabetes.  
14  
15  
16

17 426  
18  
19  
20 427 A sub-analysis among participants who perceived their neighbourhood as safe  
21  
22 428 showed similar results to the overall findings. Among participants who perceived  
23  
24 429 their neighbourhood as unsafe, decreasing trends for walking were found with  
25  
26 430 increasing greenspace proportion but this was less pronounced as the buffer size  
27  
28 431 increased. Chong et al have previously reported that perceptions of neighbourhood  
29  
30 432 safety modified the relationship between greenspace and psychological distress.<sup>43</sup> In  
31  
32 433 neighbourhoods perceived as unsafe more greenspace may exacerbate such  
33  
34 434 perceptions leading to less physical activity. This is because greenspace is  
35  
36 435 associated with lower population density, which in turn, means less passive  
37  
38 436 surveillance (e.g., “eyes on the street”) leading to worse perceived safety.  
39  
40  
41  
42  
43

44 437  
45  
46 438 The strengths of this study include a prospective design and a large population-  
47  
48 439 based cohort study. Although diagnostic or clinical information was not available to  
49  
50 440 confirm the diagnosis of type 2 diabetes among participants, in this sample self-  
51  
52 441 reported diagnosis of type 2 diabetes has high sensitivity and specificity compared to  
53  
54 442 hospital administrative data collections.<sup>32</sup> Having outcome measures at two time  
55  
56  
57  
58  
59  
60

1  
2  
3 443 points only over two to five years has limited our ability to track changes in lifestyle  
4  
5 444 behaviours over longer periods of time.  
6  
7

8 445

9  
10  
11 446 A few additional limitations apply. We were not able to differentiate between different  
12  
13 447 domains of MVPA and sitting, such as recreational, transport or occupational  
14  
15 448 physical activity and sitting. We also don't know whether each activity took place  
16  
17 449 within the local greenspace. Further, greenspace included state forests and national  
18  
19 450 parks which may or may not be conducive to walking and MVPA as urban parks and  
20  
21 451 trails. We also could not categorise greenspace into more usable categories, for  
22  
23 452 example, sports fields, bushland, presence of picnic facilities, etc., nor do we have  
24  
25 453 access to the quality of the greenspace.  
26  
27  
28

29 454

## 30 31 32 455 Conclusion

33  
34  
35 456 This study indicates that neighbourhood greenspace is related to active lifestyles  
36  
37 457 only to a very limited extent among people with newly diagnosed type 2 diabetes.

38  
39 458 This is particularly so when there is moderate amount of greenspace (15-20% of the  
40  
41 459 neighbourhood). Future studies should consider including more comprehensive  
42  
43 460 environmental measures about greenspace and other environmental attributes (e.g.,  
44  
45 461 recreational facilities), more specific measures of physical activity and sedentary  
46  
47 462 behaviour, such as the domain and location of each activity, and the more follow-up  
48  
49 463 measures over longer period of time.  
50  
51  
52

53 464

## 54 55 56 465 Acknowledgements

57  
58  
59  
60

1  
2  
3 466 This research was completed using data collected through the 45 and Up Study  
4  
5 467 (www.saxinstitute.org.au). The 45 and Up Study is managed by the Sax Institute in  
6  
7 468 collaboration with major partner Cancer Council NSW; and partners: the National  
8  
9 469 Heart Foundation of Australia (NSW Division); NSW Ministry of Health; NSW  
10  
11 470 Government Family & Community Services – Carers, Ageing and Disability  
12  
13 471 Inclusion; and the Australian Red Cross Blood Service. We thank the many  
14  
15 472 thousands of people participating in the 45 and Up Study.  
16  
17  
18  
19  
20 473

#### 21 22 474 Contributors

23  
24  
25 475 SC and SM participated in the design of the study. SC carried out the statistical  
26  
27 476 analyses. All authors helped draft the manuscript, helped with the interpretation of  
28  
29 477 the data and revised the manuscript.  
30  
31  
32

33 478

#### 34 35 479 Funding

36  
37  
38 480 The research was funded from a NH&MRC Preventative Healthcare and  
39  
40 481 Strengthening Australia's Social and Economic Fabric Program Grant.  
41  
42

43 482

#### 44 45 46 483 Competing interests

47  
48  
49 484 None declared.  
50  
51

52 485

#### 53 54 486 Ethics approval

55  
56  
57  
58  
59  
60



1  
2  
3 487 The 45 and Up Study was granted ethical approval by the NSW Population & Health  
4  
5 488 Services Research Ethic Committee (reference HREC/15/CIOHS/4) and the Cancer  
6  
7 489 Institute NSW (reference 2015/02/575).  
8  
9

10 490

11  
12  
13 491 Data sharing statement

14  
15  
16 492 No additional data are available.  
17  
18

19 493

20  
21  
22 494 References

- 23  
24  
25 495 1. Mulnier HE, Seaman HE, Raleigh VS, et al. Mortality in people with type 2 diabetes in the UK.  
26 496 *Diabetic medicine : a journal of the British Diabetic Association* 2006;23(5):516-21. doi:  
27 497 10.1111/j.1464-5491.2006.01838.x [published Online First: 2006/05/10]  
28 498 2. Hu G, Jouslahti P, Barengo NC. Physical activity, cardiovascular risk factors, and mortality among  
29 499 Finnish adults with diabetes. *Diabetes Care* 2005;28:799-805.  
30 500 3. Baker IDI Heart & Diabetes Institute. Diabetes: the silent pandemic and its impact on Australia  
31 501 Australia: Baker IDI Heart and Diabetes Institute, 2012.  
32 502 4. Norris SL, Zhang X, Avenell A, et al. Long-term effectiveness of lifestyle and behavioral weight loss  
33 503 interventions in adults with type 2 diabetes: a meta-analysis. *The American journal of*  
34 504 *medicine* 2004;117(10):762-74. doi: 10.1016/j.amjmed.2004.05.024 [published Online First:  
35 505 2004/11/16]  
36 506 5. Klein S, Sheard NF, Pi-Sunyer X, et al. Weight management through lifestyle modification for the  
37 507 prevention and management of type 2 diabetes: rationale and strategies. A statement of the  
38 508 American diabetes association, the North American association for the study of obesity, and  
39 509 the American society for clinical nutrition. *American journal of clinical nutrition*  
40 510 2004;80(2):257-63.  
41 511 6. Tuomilehto J, Lindstrom J, Eriksson JG, et al. Prevention of type 2 diabetes mellitus by changes in  
42 512 lifestyle among subjects with impaired glucose tolerance. *New England Journal of Medicine*  
43 513 2001;344:1343-50.  
44 514 7. Castaneda C, Layne JE, Munoz-Orians L. A randomised controlled trial of resistance exercise  
45 515 training to improve glycemic control in older adults with type 2 diabetes. *Diabetes Care*  
46 516 2002;25:2335-41.  
47 517 8. Australian Diabetes Council. 10 ways to manage diabetes. NSW, Australia: Australian Diabetes  
48 518 Council, 2010.  
49 519 9. Health Canada. Diabetes in Canada: National Statistics and Opportunities for Improved  
50 520 Surveillance, Prevention and Control. Ottawa, Ontario, 1999:1-69.  
51 521 10. Nelson KM, Reiber G, Boyko EJ. Diet and Exercise Among Adults With Type 2 Diabetes. *Findings*  
52 522 *from the Third National Health and Nutrition Examination Survey (NHANES III)*  
53 523 2002;25(10):1722-28. doi: 10.2337/diacare.25.10.1722  
54 524 11. Bauman AE, Reis RS, Sallis JF, et al. Correlates of physical activity: why are some people physically  
55 525 active and others not? *The Lancet* 2012;380(9838):258-71. doi: 10.1016/S0140-  
56 526 6736(12)60735-1  
57  
58  
59  
60

- 1  
2  
3 527 12. Ding D, Gebel K. Built environment, physical activity, and obesity: What have we learned from  
4 528 reviewing the literature? *Health Place* 2012;18(1):100-05. doi:  
5 529 <https://doi.org/10.1016/j.healthplace.2011.08.021>  
6 530 13. Sundquist K, Eriksson U, Mezuk B, et al. Neighborhood walkability, deprivation and incidence of  
7 531 type 2 diabetes: a population-based study on 512,061 Swedish adults. *Health Place*  
8 532 2015;31:24-30. doi: 10.1016/j.healthplace.2014.10.011 [published Online First: 2014/12/03]  
9 533 14. Thomas N, Alder E, Leese GP. Barriers to physical activity in patients with diabetes. *Postgraduate*  
10 534 *Medical Journal* 2004;80(943):287-91.  
11 535 15. Maas J, Verheij R, Spreeuwenberg P, et al. Physical activity as a possible mechanism behind the  
12 536 relationship between green space and health: A multilevel analysis. *BMC Public Health*  
13 537 2008;8(1):206.  
14 538 16. Hillsdon M, Panter J, Foster C, et al. The relationship between access and quality of urban green  
15 539 space with population physical activity. *Public Health* 2006;120(12):1127-32. doi:  
16 540 10.1016/j.puhe.2006.10.007 [published Online First: 2006/10/28]  
17 541 17. Bedimo-Rung AL, Mowen AJ, Cohen DA. The significance of parks to physical activity and public  
18 542 health: a conceptual model. *Am J Prev Med* 2005;28 doi: 10.1016/j.amepre.2004.10.024  
19 543 18. Greenspace Scotland. Health impact assessment of greenspace: a guide. In: scotland g, ed.  
20 544 Stirling, 2008.  
21 545 19. Coombes E, Jones AP, Hillsdon M. The relationship of physical activity and overweight with  
22 546 objectively measured green space accessibility and use. *Social Science and Medicine*  
23 547 2010;70(6):816-22.  
24 548 20. McCormack GR, Rock M, Toohey AM, et al. Characteristics of urban parks associated with park  
25 549 use and physical activity: a review of qualitative research. *Health Place* 2010;16:712-26.  
26 550 21. Sigal RJ, Kenny GP, Wasserman DH, et al. Physical Activity/Exercise and Type 2 Diabetes. A  
27 551 *consensus statement from the American Diabetes Association* 2006;29(6):1433-38. doi:  
28 552 10.2337/dc06-9910  
29 553 22. Schneider KL, Andrews C, Hovey KM, et al. Change in physical activity after a diabetes diagnosis:  
30 554 opportunity for intervention. *The official journal of the American College of Sports Medicine*  
31 555 2014;46(1):84-91.  
32 556 23. Penn L, Moffatt SM, White M. Participants' perspective on maintaining behaviour change: a  
33 557 qualitative study within the European Diabetes Prevention Study. *BMC Public Health*  
34 558 2008;8(235):1-11.  
35 559 24. Sax Institute. Guidelines for authors regarding technical review of 45 and Up Study papers 2015  
36 560 2015 [Available from: [http://saxinstitute.org.au/wp-content/uploads/Guidelines-for-](http://saxinstitute.org.au/wp-content/uploads/Guidelines-for-authors-regarding-technical-review-of-45-and-Up-Study-papers.pdf)  
37 561 [authors-regarding-technical-review-of-45-and-Up-Study-papers.pdf](http://saxinstitute.org.au/wp-content/uploads/Guidelines-for-authors-regarding-technical-review-of-45-and-Up-Study-papers.pdf) accessed 11th January,  
38 562 2016 2016.  
39 563 25. Sax Institute. Questionnaire. 2016.  
40 564 26. Feeney K. NSW Walking Strategy. Literature Review. Australia, 2011.  
41 565 27. Ding D, Rogers K, van der Ploeg H, et al. Traditional and Emerging Lifestyle Risk Behaviors and All-  
42 566 Cause Mortality in Middle-Aged and Older Adults: Evidence from a Large Population-Based  
43 567 Australian Cohort. *PLOS Medicine* 2015;12(12):e1001917. doi:  
44 568 10.1371/journal.pmed.1001917  
45 569 28. Australian Institute of Health and Welfare. The Active Australia Survey: a guide and manual for  
46 570 implementation, analysis and reporting. Canberra: Australian Institute of Health and Welfare  
47 571 (AIHW), 2003.  
48 572 29. Brown WJ, Trost SG, Bauman A, et al. Test-retest reliability of four physical activity measures  
49 573 used in population surveys. *Journal of science and medicine in sport / Sports Medicine*  
50 574 *Australia* 2004;7(2):205-15. [published Online First: 2004/09/15]  
51 575 30. Heesch KC, Hill RL, van Uffelen JG, et al. Are Active Australia physical activity questions valid for  
52 576 older adults? *Journal of science and medicine in sport / Sports Medicine Australia*  
53 577 2011;14(3):233-7. doi: 10.1016/j.jsams.2010.11.004 [published Online First: 2011/02/01]  
54  
55  
56  
57  
58  
59  
60

- 1  
2  
3 578 31. Bauman A. TRENDS IN EXERCISE PREVALENCE IN AUSTRALIA. *Community Health Studies*  
4 579 1987;11(3):190-96. doi: 10.1111/j.1753-6405.1987.tb00005.x  
5 580 32. Comino EJ, Tran DT, Haas M, et al. Validating self-report of diabetes use by participants in the 45  
6 581 and Up Study: a record linkage study. *BMC Health Serv Res* 2013;13:481. doi: 10.1186/1472-  
7 582 6963-13-481 [published Online First: 2013/11/20]  
8 583 33. Stewart. A, Kamberg. CJ. Measuring functioning and well-being: The Medical Outcomes Study  
9 584 approach. . North Carolina: Duke University 1992.  
10 585 34. Brooks RT, Beard J, Steel Z. Factor structure and interpretation of the K10. *Psychol Assess*  
11 586 2006;18(1):62-70. doi: 10.1037/1040-3590.18.1.62 [published Online First: 2006/04/06]  
12 587 35. ABS. National Health Survey: Summary or results, Australia 2004-05. Canberra, 2006.  
13 588 36. Francis J, Wood LJ, Knuiman M, et al. Quality or quantity? Exploring the relationship between  
14 589 Public Open Space attributes and mental health in Perth, Western Australia. *Soc Sci Med*  
15 590 2012;74(10):1570-77. doi: <http://dx.doi.org/10.1016/j.socscimed.2012.01.032>  
16 591 37. ABS. Perspectives on Sport, May 2009 Canberra, Australia: ABS, 2009.  
17 592 38. ABS. Participation in Sport and Physical Recreation 2009-10. Canberra: ABS, 2016.  
18 593 39. Maas J, Verheij RA, Spreeuwenberg P, et al. Physical activity as a possible mechanism behind the  
19 594 relationship between green space and health: a multilevel analysis. *BMC Public Health*  
20 595 2008;8:206. doi: 10.1186/1471-2458-8-206 [published Online First: 2008/06/12]  
21 596 40. O'Donoghue G, Perchoux C, Mensah K, et al. A systematic review of correlates of sedentary  
22 597 behaviour in adults aged 18–65 years: a socio-ecological approach. *BMC Public Health*  
23 598 2016;16(1):163. doi: 10.1186/s12889-016-2841-3  
24 599 41. Wallmann-Sperlich B, Bucksch J, Hansen S, et al. Sitting time in Germany: an analysis of socio-  
25 600 demographic and environmental correlates. *BMC Public Health* 2013;13(196)  
26 601 42. Diabetes Australia. Physical activity & type 2 diabetes. *Talking diabetes A diabetes information*  
27 602 *series from Diabetes NSW* 2012; 27. [http://diabetesnsw.com.au/wp-](http://diabetesnsw.com.au/wp-content/uploads/2014/12/DA-27-Physical-health-and-diabetes.pdf)  
28 603 [content/uploads/2014/12/DA-27-Physical-health-and-diabetes.pdf](http://diabetesnsw.com.au/wp-content/uploads/2014/12/DA-27-Physical-health-and-diabetes.pdf) (accessed 20-12-2016).  
29 604 43. Chong S, Lobb E, Khan R, et al. Neighbourhood safety and area deprivation modify the  
30 605 associations between parkland and psychological distress in Sydney, Australia. *BMC Public*  
31 606 *Health* 2013;13(1):422. doi: 10.1186/1471-2458-13-422

607

608

609

610

611

612

613

614

615

616

For peer review only

1  
2  
3  
4  
5  
6  
7  
8  
9  
10  
11  
12  
13  
14  
15  
16  
17  
18  
19  
20  
21  
22  
23  
24  
25  
26  
27  
28  
29  
30  
31  
32  
33  
34  
35  
36  
37  
38  
39  
40  
41  
42  
43  
44  
45  
46  
47  
48  
49  
50  
51  
52  
53  
54  
55  
56  
57  
58  
59  
60

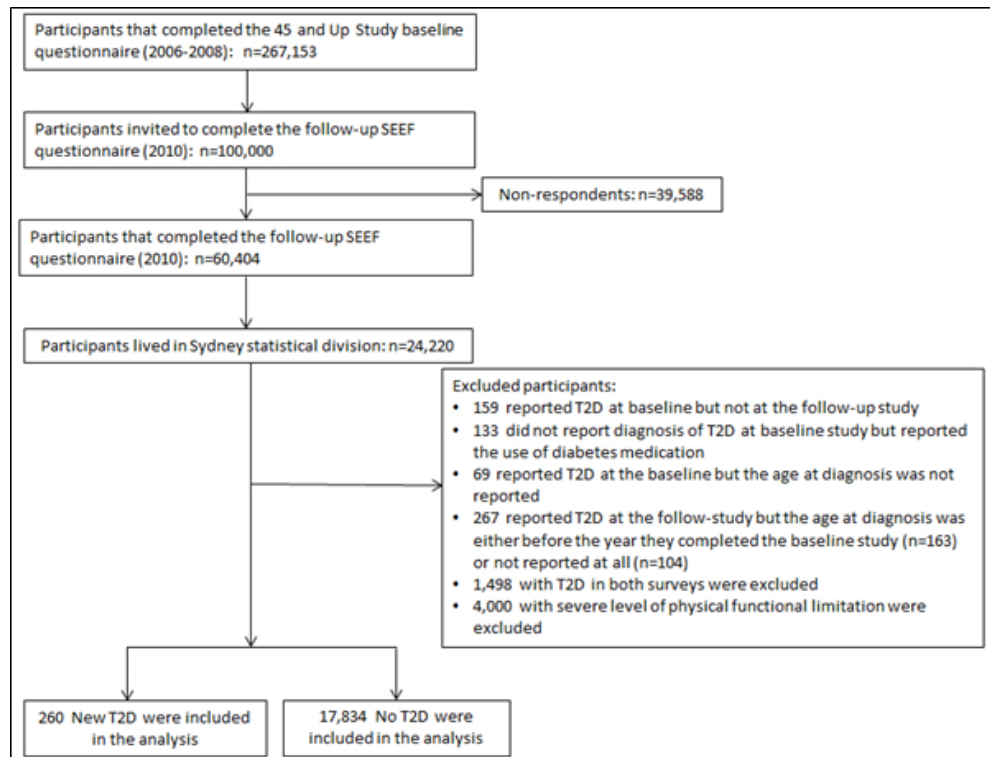

160x122mm (96 x 96 DPI)

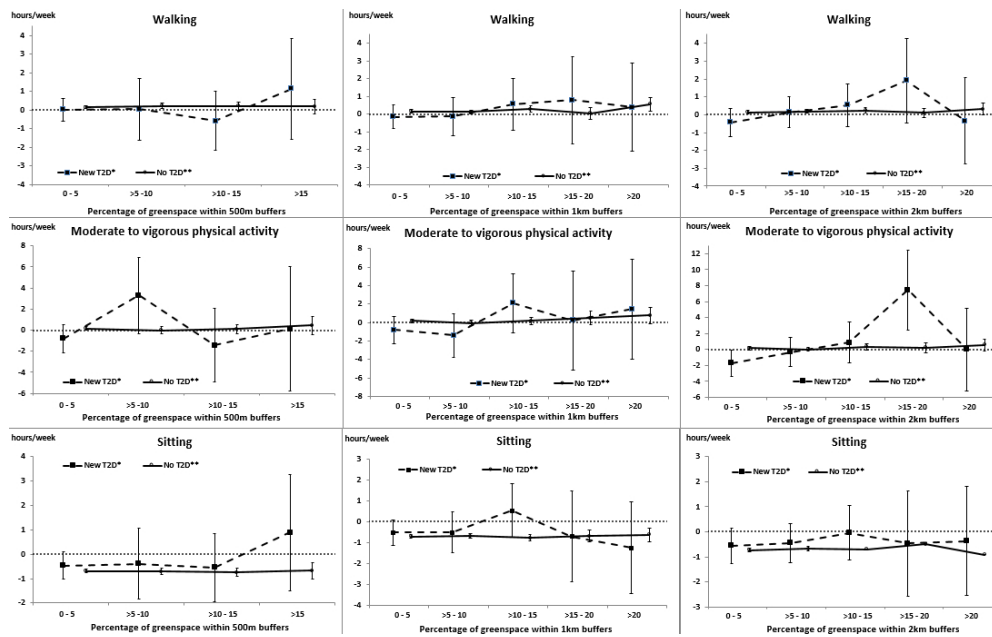

291x182mm (96 x 96 DPI)

1  
2  
3  
4  
5  
6  
7  
8  
9  
10  
11  
12  
13  
14  
15  
16  
17  
18  
19  
20  
21  
22  
23  
24  
25  
26  
27  
28  
29  
30  
31  
32  
33  
34  
35  
36  
37  
38  
39  
40  
41  
42  
43  
44  
45  
46  
47  
48  
49  
50  
51  
52  
53  
54  
55  
56  
57  
58  
59  
60

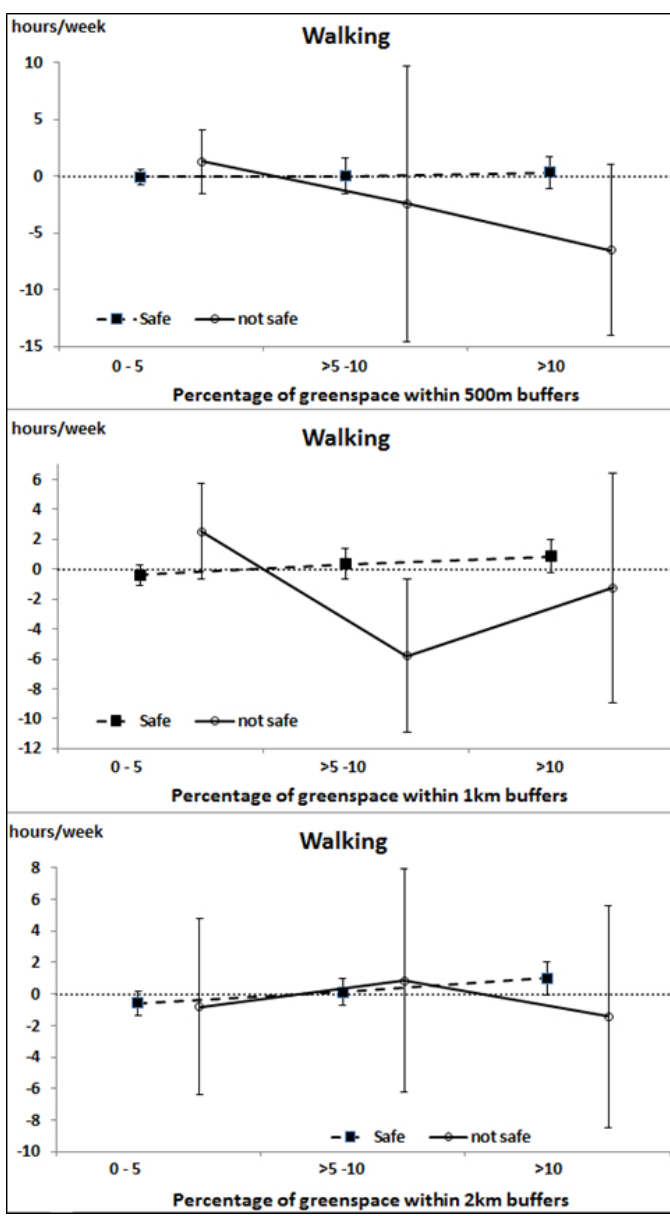

128x227mm (96 x 96 DPI)

# BMJ Open

## Neighbourhood greenspace and physical activity and sedentary behaviour among older adults with a recent diagnosis of type 2 diabetes: A Prospective analysis

|                                 |                                                                                                                                                                                                                                                                                                                                                                                                                                                      |
|---------------------------------|------------------------------------------------------------------------------------------------------------------------------------------------------------------------------------------------------------------------------------------------------------------------------------------------------------------------------------------------------------------------------------------------------------------------------------------------------|
| Journal:                        | <i>BMJ Open</i>                                                                                                                                                                                                                                                                                                                                                                                                                                      |
| Manuscript ID                   | bmjopen-2019-028947.R1                                                                                                                                                                                                                                                                                                                                                                                                                               |
| Article Type:                   | Original research                                                                                                                                                                                                                                                                                                                                                                                                                                    |
| Date Submitted by the Author:   | 30-Jul-2019                                                                                                                                                                                                                                                                                                                                                                                                                                          |
| Complete List of Authors:       | Chong, Shanley; South Western Sydney Local Health District; University of New South Wales, Western Sydney Clinical School<br>Mazumdar, Soumya; South Western Sydney Local Health District<br>Ding, Ding; University of Sydney<br>Morgan, Geoff; University of Sydney<br>Comino, Elizabeth; University of New South Wales<br>Bauman, Adrian; University of Sydney<br>Jalaludin, Bin; South Western Sydney Local Health District; University of Sydney |
| <b>Primary Subject Heading</b>: | Diabetes and endocrinology                                                                                                                                                                                                                                                                                                                                                                                                                           |
| Secondary Subject Heading:      | Diabetes and endocrinology                                                                                                                                                                                                                                                                                                                                                                                                                           |
| Keywords:                       | physical activity, diabetes, green space                                                                                                                                                                                                                                                                                                                                                                                                             |
|                                 |                                                                                                                                                                                                                                                                                                                                                                                                                                                      |

SCHOLARONE™  
Manuscripts



1  
2  
3 1 Full title: Neighbourhood greenspace and physical activity and sedentary behaviour  
4  
5 2 among older adults with a recent diagnosis of type 2 diabetes: A Prospective  
6  
7 3 analysis  
8  
9

10 4  
11  
12  
13 5 Shanley Chong, PhD  
14  
15

16 6 Affiliation: Population Health Intelligence, Healthy People & Places Unit Population  
17  
18 7 Health, South Western Sydney Local Health District, New South Wales, Australia.  
19  
20  
21 8 South Western Sydney Clinical School, University of New South Wales, New South  
22  
23 9 Wales, Australia.  
24  
25

26 10  
27  
28  
29 11 Soumya Mazumdar, PhD  
30  
31

32 12 Affiliation: Population Health Intelligence, Healthy People & Places Unit Population  
33  
34 13 Health, South Western Sydney Local Health District, New South Wales, Australia.  
35  
36  
37 14 South Western Sydney Clinical School, University of New South Wales, New South  
38  
39 15 Wales, Australia.  
40  
41

42 16  
43  
44  
45 17 Ding Ding, PhD  
46  
47

48 18 Affiliation: Prevention Research Collaboration, Sydney School of Public Health,  
49  
50 19 University of Sydney, Camperdown, New South Wales, Australia.  
51  
52

53 20 Charles Perkins Centre, University of Sydney, Camperdown, New South Wales,  
54  
55 21 Australia.  
56  
57

58 22 Geoff Morgan, PhD  
59  
60

1  
2  
3 23 Affiliation: University Centre for Rural Health, School of Public Health, University of  
4  
5 24 Sydney, New South Wales, Australia.  
6  
7

8 25  
9

10  
11 26 Elizabeth Comino, Phd  
12

13  
14 27 Ingham Institute Applied Medical Research Liverpool BC, New South Wales,  
15  
16 28 Australia.  
17

18  
19 29 Centre for Health, Equity, Training, Research and Evaluation (CHETRE), University  
20  
21 30 of New South Wales, New South Wales, Australia.  
22

23  
24 31 Australia Research Centre for Primary Health Care and Equity, A Unit of Population  
25  
26 32 Health, South Western Sydney Local Health District, NSW Health Sydney, New  
27  
28 33 South Wales, Australia.  
29

30  
31 34  
32

33  
34 35 Adrian Bauman, Phd  
35

36  
37 36 Affiliation: Prevention Research Collaboration, Sydney School of Public Health,  
38  
39 37 University of Sydney, Camperdown, New South Wales, Australia.  
40

41  
42 38 Charles Perkins Centre, University of Sydney, Camperdown, New South Wales,  
43  
44 39 Australia.  
45

46  
47 40  
48

49  
50 41 Bin Jalaludin, Phd  
51

52  
53 42 Affiliation: Population Health Intelligence, Healthy People & Places Unit Population  
54  
55 43 Health, South Western Sydney Local Health District, New South Wales, Australia.  
56  
57  
58  
59  
60

1  
2  
3  
4  
5  
6  
7  
8  
9  
10  
11  
12  
13  
14  
15  
16  
17  
18  
19  
20  
21  
22  
23  
24  
25  
26  
27  
28  
29  
30  
31  
32  
33  
34  
35  
36  
37  
38  
39  
40  
41  
42  
43  
44  
45  
46  
47  
48  
49  
50  
51  
52  
53  
54  
55  
56  
57  
58  
59  
60

44 School of Public Health and Community Medicine, University of New South Wales,  
45 New South Wales, Australia.

46

47 Corresponding author:

48 Bin Jalaludin

49 Locked Bag 7279, LIVERPOOL NSW 1871, Australia

50 Tel: +61287386093

51 Fax: +61287386884

52 Email: [Bin.Jalaludin@health.nsw.gov.au](mailto:Bin.Jalaludin@health.nsw.gov.au)

53

54

55

56

57

58

59

60

61

62

63

64

For peer review only

1  
2  
3 65 Abstract  
4  
5

6 66 Objectives:  
7  
8

9 67 Greenspace is one of the important factors that can promote an active lifestyle.

10  
11 68 Thus, greener surroundings may be a motivating factor for people with newly  
12  
13 69 diagnosed diabetes to engage in more physical activity. Given that diagnosis of type  
14  
15 70 2 diabetes (T2D) may serve as a window opportunity for behavioural modification,  
16  
17 71 we hypothesise that the association between neighbourhood greenspace and  
18  
19 72 physical activity among people with newly diagnosed T2D may be greater than those  
20  
21 73 not diagnosed with T2D. The aim of this study was to investigate the association  
22  
23 74 between access to greenspace and changes in physical activity and sedentary  
24  
25 75 behaviour, and whether these associations differed by T2D.  
26  
27  
28  
29

30 76 Design: Prospective cohort.  
31  
32

33 77 Setting: New South Wales, Australia  
34  
35

36 78 Methods:  
37  
38

39 79 We used self-reported information from the New South Wales 45 and Up Study  
40  
41 80 (baseline) and a follow-up study. Information on sitting, walking and moderate to  
42  
43 81 vigorous physical activity was used as outcomes. The proportion of greenspace  
44  
45 82 within 500m, 1km and 2km road network buffers around participant's residential  
46  
47 83 address was generated as a proxy measure for access to greenspace. The  
48  
49 84 association between the access to greenspace and the outcomes were explored  
50  
51 85 among the newly diagnosed T2D group and those without T2D.  
52  
53  
54

55 86 Results:  
56  
57

58 87 Among New T2D, although no significant changes were found in the amount of  
59  
60 88 walking with the percentage of greenspace, increasing trends were apparent. There

1  
2  
3 89 was a significant association between the percentage of greenspace within 2km  
4  
5 90 buffer and changes in amount of MVPA. Among No T2D, there were no significant  
6  
7 91 associations between the amount of MVPA and walking, and percentage of  
8  
9 92 greenspace. For changes in sitting time, there were no significant associations with  
10  
11 93 percentage of greenspace regardless of buffer size.  
12  
13  
14  
15  
16

94

95 Conclusions:

96 This study indicates that neighbourhood greenspace is related to increases in  
97 MVPA, but only within the 2km buffer, among people with newly diagnosed T2D.

98 Strengths and Limitations of this study

- 99
- 100 • This is the first study to explore environmental influences on the behaviours of  
101 people who transition into living with type 2 diabetes, and compare its  
102 association with those without T2DM.
  - 103 • This is a large population-based cohort with data available at two time points.
  - 104 • A limitation is that the change in duration of physical activity and sitting were  
105 calculated from self-reported surveys.
- 106  
107

108 Introduction

109 Type 2 diabetes is a lifelong condition and is associated with increased risk for  
110 cardiovascular, renal disease<sup>1</sup> and mortality.<sup>2,3</sup> A healthy lifestyle that includes, for  
111 example regular physical activity, can help maintain healthy blood glucose levels and

1  
2  
3 112 reduce the risk of complications of type 2 diabetes.<sup>4-7</sup> However, only about half of  
4  
5 113 Australians with diabetes achieve adequate control of their blood glucose level.<sup>3</sup>  
6  
7  
8 114

9  
10 115 It is recommended that adults, including those diagnosed with type 2 diabetes  
11  
12 116 engage in at least 30 minutes of physical activity every day.<sup>8</sup> In a population-based  
13  
14 117 study in Australia, participants with incident type 2 diabetes reported lack of changes  
15  
16 118 in their walking and moderate to vigorous physical activity (MVPA) after their  
17  
18 119 diagnosis. Studies reported that 60% of people aged 35-64 years with diabetes  
19  
20 120 (types 1 and 2) were not achieving the recommended level of physical activity,<sup>9</sup> one  
21  
22 121 third of adults with type 2 diabetes were completely inactive<sup>10</sup> and only a third  
23  
24 122 exercised on regular basis.<sup>10</sup> Physical activity behaviour is determined by a range of  
25  
26 123 biological, psychosocial and environmental factors.<sup>11</sup> Built environment attributes  
27  
28 124 are frequently found to be associated with physical activity,<sup>12</sup> and activity-unfriendly  
29  
30 125 environments may be associated with higher type 2 diabetes incidence.<sup>13</sup> For  
31  
32 126 example, a study reported that one of the barriers among inactive patients with  
33  
34 127 diabetes (both type 1 and 2) was lack of local facilities.<sup>14</sup>  
35  
36  
37  
38  
39  
40  
41 128

42  
43 129 One environmental attribute that plays an important role in physical activity is  
44  
45 130 greenspace.<sup>15-17</sup> Greenspace is defined as any vegetated land adjoining an urban  
46  
47 131 area which includes bushland, nature reserves, national parks, outdoor sports fields,  
48  
49 132 school playgrounds and rural or semi-rural areas immediately adjoining an urban  
50  
51 133 area.<sup>18</sup> Several studies have found that people who have better access to parks and  
52  
53 134 green spaces are more likely to report that they engage in physical activity.<sup>19 20</sup> The  
54  
55 135 potential mechanism for these associations may be that greenspace prompts,  
56  
57 136 facilitates, and reinforces location-specific physical activity,<sup>21</sup> while simultaneously

1  
2  
3 137 discouraging sedentary lifestyles . Thus, greener surroundings may be a motivating  
4  
5 138 factor among people with newly diagnosed diabetes to engage in more physical  
6  
7 139 activity. Given that diagnosis of type 2 diabetes may serve as a window opportunity  
8  
9  
10 140 for behavioural modification,<sup>22 23</sup> we hypothesise that the association between  
11  
12 141 neighbourhood greens pace and physical activity among people with newly  
13  
14 142 diagnosed type 2 diabetes may be greater than those never diagnosed with type 2  
15  
16 143 diabetes.

144

145 Using data from a large cohort study in New South Wales (NSW), Australia, we  
146 aimed to investigate the associations between the access to neighbourhood  
147 greenspace and changes in physical activity and sitting time by type 2 diabetes  
148 diagnosis status.

149

## 150 Materials and Method

### 151 Study population

152 The study area was the Sydney Statistical Division (Figure 1a) which has a  
153 population of approximately 4.12 million people and covers an area of 12,428 square  
154 kilometres. It is the largest urban agglomeration in Australia, with a wide range of  
155 environmental features and diverse sociodemographic characteristics.

156 Information about physical activity and relevant covariates at the individual level was  
157 obtained from the baseline 45 and Up Study and the Social, Economic and  
158 Environmental Factors (SEEF) follow-up Study. The 45 and Up Study is a  
159 population-based cohort survey of NSW residents aged 45 years and older.

160 Recruitment was undertaken between 2006 and 2009. Potential participants were

1  
2  
3 161 randomly selected from the Medicare Australia database (Australia's universal public  
4  
5 162 health insurance system). Participants joined the study by completing a mailed self-  
6  
7 163 administered questionnaire and providing consent for long-term follow-up, including  
8  
9  
10 164 linkage to various personal health records. The response rate was 18% and  
11  
12 165 participants comprised 11% of the NSW population aged 45 years and over.<sup>24</sup> The  
13  
14 166 full study cohort consists of 267,153 people aged 45 years or older at the time of  
15  
16  
17 167 recruitment.

18  
19  
20 168  
21  
22 169 Figure 1: Sydney statistical division (1a) and 500m polygon-based network buffer  
23  
24  
25 170 (1b).

26  
27 171 In 2010, the SEEF Study questionnaire was distributed to the first 100,000  
28  
29 172 participants of the 45 and Up Study, of whom 60,404 returned the completed  
30  
31 173 questionnaire. The average follow-up period was  $3.3 \pm 0.9$  years (median=2.8 years,  
32  
33 174 range=1.7-5.1 years, inter-quartile range=2.6 to 4.6 years). Questionnaires for both  
34  
35 175 the 45 and Up and the SEEF Study are available from the Sax Institute website<sup>25</sup>. Of  
36  
37 176 the 60,404 participants, 24,220 resided in the study area at the time of the baseline  
38  
39 177 45 and Up Study.

40  
41  
42 178  
43  
44  
45  
46 179 The baseline 45 and Up and the SEEF Study were approved by the University of  
47  
48 180 New South Wales Human Research Ethics Committee and the University of Sydney  
49  
50 181 Human Research Ethics Committee respectively.

## 51 52 182 Measures

53  
54  
55 183 *Exposure: access to greenspace*



1  
2  
3 184 We used the percentage of greenspace within 500m, 1km and 2km polygon-based  
4  
5 185 road network (PBRN) buffers (Figure 1b) around participants' residences (available  
6  
7 186 for the baseline survey only) as proxies for geographic access to greenspace. These  
8  
9  
10 187 buffer sizes were chosen as they are considered as walkable distance.<sup>26</sup>  
11  
12 188  
13  
14 189 Greenspace data was obtained from StreetPro (PitneyBowers Inc., USA). In this  
15  
16 190 dataset, greenspace includes national parks, nature reserves, historic sites, state  
17  
18 191 forests, State recreation areas, wildlife refuges, conservation parks, protected areas,  
19  
20 192 wildlife reserves, urban recreation parks and other urban greenspaces. The PBRN  
21  
22 193 buffers were created using the StreetPro Navigation (PitneyBowers Inc., USA) road  
23  
24 194 network file and ArcGIS network analyst to calculate the endpoints of all possible  
25  
26 195 routes up to the specified distance (500m, 1km and 2km) along the road network for  
27  
28 196 each participant's residence. The endpoints were then connected to form irregular  
29  
30 197 polygons. Percentage of greenspace within PBRN buffers were categorised into 0-  
31  
32 198 5%, >5-10%, >10-15%, >15-20% and >20%. We combined >15-20% and >20% for  
33  
34 199 greenspace within 500m buffers due to the small sample sizes.  
35  
36  
37  
38  
39  
40  
41

#### 42 201 *Outcomes: duration of sitting and physical activity*

43  
44  
45 202 Information on sitting (hours per week), walking (minutes per week) and MVPA  
46  
47 203 (minutes per week) was collected in both surveys. Duration of sitting was adapted  
48  
49 204 from the International Physical Activity Questionnaire which has acceptable  
50  
51 205 reliability<sup>27</sup> and validity.<sup>27</sup> Physical activity was assessed using the Active Australia  
52  
53 206 Survey<sup>28</sup> which also has acceptable reliability<sup>29</sup> and validity.<sup>30</sup> In this instrument,  
54  
55 207 walking is defined as walking for recreation or exercise or to get to or from places.  
56  
57 208 Vigorous physical activity refers to any activity that causes a participant to breathe  
58  
59  
60

1  
2  
3 209 harder or puff and pant. Moderate physical activity refers to less intense activities  
4  
5 210 such as gentle swimming, social tennis, vigorous gardening or work around the  
6  
7 211 house. Total weighted minutes of MVPA per week is calculated by the sum of  
8  
9 212 minutes of walking, moderate physical activity and twice the minutes of vigorous  
10  
11 213 physical activity.<sup>29</sup> Reported time spent on walking and MVPA greater than 14 hours  
12  
13 214 per day was considered as an impossible value and recoded to 14 hours. <sup>31</sup> We  
14  
15 215 conceptualised walking and total MVPA as two separate outcomes because walking  
16  
17 216 is expected to be more specifically related to neighbourhood greenspace while total  
18  
19 217 MVPA is commonly used as a measure of overall levels of health-enhancing physical  
20  
21 218 activity.  
22  
23  
24  
25  
26  
27  
28

### 29 220 *Type 2 diabetes diagnosis*

30  
31  
32 221 New cases of type 2 diabetes were defined as those participants who did not report  
33  
34 222 T2D at the baseline survey but reported type 2 diabetes at the follow-up survey (New  
35  
36 223 type 2 diabetes). The comparator group was participants who did not report type 2  
37  
38 224 diabetes at both baseline and follow-up surveys (No type 2 diabetes). The questions  
39  
40 225 asked to determine a diagnosis of type 2 diabetes at the baseline survey were “Has  
41  
42 226 a doctor ever told you that you have diabetes” and “Have you taken Diabex,  
43  
44 227 Diaformin, Metformin for most of the last 4 weeks”.  
45  
46  
47  
48

49 228  
50  
51 229 Participants who reported that they had been told by a doctor that they had diabetes  
52  
53 230 were then also asked about their age at diagnosis. For participants with newly  
54  
55 231 diagnosed type 2 diabetes, the time lapse since diagnosis to completion of the SEEF  
56  
57 232 Study questionnaire was also calculated (age at time of completion of SEEF Study  
58  
59  
60

1  
2  
3 233 questionnaire minus age at type 2 diabetes diagnosis). Self-reported diagnosis of  
4  
5 234 type 2 diabetes in the 45 and Up Study has high sensitivity (83.7%) and specificity  
6  
7  
8 235 (97.7%) compared to administrative hospitalisation data <sup>32</sup>.  
9  
10  
11 236

### 13 237 *Covariates*

16 238 A directed acyclic graph (DAG) was used to select potential covariates (Figure 2) to  
17  
18 239 predict physical activity and duration of sitting, and likely influence where people  
19  
20 240 lived (and thus their neighbourhood exposure to greenspace). A list of covariates  
21  
22  
23 241 include socio-demographic characteristics (age, gender, country of birth (English  
24  
25 242 speaking countries, Europe, Middle-East, Asia, Other)) and an area-level deprivation  
26  
27  
28 243 score . Area-level deprivation was measured by 2006 Index of Relative Socio-  
29  
30 244 Economic Disadvantage (IRSED) quintiles at the postcode level. The IRSED was  
31  
32 245 created by the Australian Bureau of Statistics to compare social and economic  
33  
34 246 disadvantage across geographical areas in Australia. The index is derived from the  
35  
36  
37 247 2006 Census variables such as income, educational attainment, unemployment, and  
38  
39 248 people working in unskilled occupations<sup>33</sup>.  
40  
41

42 249 We also included physical functioning (measured using the Medical Outcomes Study  
43  
44 250 (MOS) Physical Functioning Scale; it ranges from 0 to 100 and was categorised into  
45  
46 251 no limitation (100), minor limitation (95-99), moderate limitation (85-94), or severe  
47  
48  
49 252 limitation (0-84)) <sup>34</sup>, psychological distress (Kessler-10 (K10); a K10 score of  $\geq 22$   
50  
51 253 reflects high or very high psychological distress<sup>35</sup>) and body mass index (BMI) as  
52  
53 254 potential covariates.  
54  
55

56 255 Figure 2: Directed acyclic graph of the relationship between neighbourhood  
57 256 greenspace and physical activity and sitting.  
58  
59 257  
60

1  
2  
3 258  
4  
56 259 *Statistical analysis*  
7

8  
9 260 The Kruskal-Wallis test was used to compare continuous baseline lifestyle variables  
10  
11 261 between type 2 diabetes groups. Separate multivariate linear regression models  
12  
13 262 were used to examine the association between greenspace access and change in  
14  
15 263 outcome variables (in MVPA, walking, and sitting). All the potential confounders  
16  
17 264 presented in DAG (Figure 2) were tested in univariate regression model. Only  
18  
19 265 statistically significant variables from univariate regression analyses were included in  
20  
21 266 the final model to account for any potential confounding. These variables were age,  
22  
23 267 gender, educational attainment, level of physical functional limitation, IRSED, BMI,  
24  
25 268 duration of type 2 diabetes diagnosis (New type 2 diabetes group only), follow-up  
26  
27 269 time and the baseline value of each outcome in specific models. To examine  
28  
29 270 whether the association between greenspace and change in outcome variables  
30  
31 271 modified by the presence of type 2 diabetes, a two-way interaction between the  
32  
33 272 status of type 2 diabetes (New type 2 diabetes and No type 2 diabetes) and  
34  
35 273 percentage of greenspace was explored. We then developed regression models,  
36  
37 274 stratified by the presence of type 2 diabetes. Predicted values of change and  
38  
39 275 associated 95% confidence intervals (CIs) were reported. To adjust for multiple  
40  
41 276 comparison, Bonferroni method were used in the final models. Statistical analyses  
42  
43 277 were conducted using SAS version 9.4 (SAS Institute, Cary, NC).  
44  
45  
46  
47  
48  
49  
50

51 278  
5253 279  
54  
5556 280 **Results**  
57  
58  
59  
60

1  
2  
3 281 Of the 24,220 participants living in Sydney Statistical Division, 628 were excluded  
4  
5 282 due to inconsistent reporting between baseline and follow-up surveys, 1,498 were  
6  
7 283 excluded due to reporting type 2 diabetes at both baseline and follow-up and an  
8  
9  
10 284 additional 4,000 were excluded because of severe level of physical function, making  
11  
12 285 physical activity challenging or infeasible, leaving 18,094 participants in the analytical  
13  
14 286 sample (Figure 3).

17 287 Figure 3: Flow chart of sample selection  
18  
19 288

21 289 Of the 18,094 participants, 260 (1.4%) reported type 2 diabetes in the follow-up  
22  
23 290 survey but not in the baseline survey (New type 2 diabetes) whereas 17,834 (98.6%)  
24  
25 291 participants did not report type 2 diabetes at both baseline and follow-up (No type 2  
26  
27 292 diabetes). The average duration of time since diagnosis was  $1.8 \pm 1.1$  years  
28  
29 293 (median=1.7 years). More than half of all the participants were female (52.0%) and  
30  
31 294 the average age of participants was  $59.5 \pm 9.6$  years. The majority of participants  
32  
33 295 were born in an English speaking country (85.2%) and about one-quarter had not  
34  
35 296 completed high school education (Table 1).

41 297 Table 1 shows changes in outcome variables at follow-up by baseline  
42  
43 298 sociodemographic characteristics and access to greenspace. There were significant  
44  
45 299 associations of age group, IRSED, physical functional limitation, BMI, with change in  
46  
47 300 the amount of walking and MVPA. Significant associations were also found between  
48  
49 301 gender and change in the amount of walking and sitting. Educational attainment was  
50  
51 302 significantly associated with a change in sitting time. There were no significant  
52  
53 303 associations between greenspace and changes in MVPA, walking and sitting.

58 304 Table 1: Changes in outcome variables at follow-up by baseline characteristics

|  |  | Change in MVPA <sup>1</sup><br>(hours/week) | Change in walking <sup>2</sup><br>(hours/week) | Change in sitting <sup>3</sup> |
|--|--|---------------------------------------------|------------------------------------------------|--------------------------------|
|--|--|---------------------------------------------|------------------------------------------------|--------------------------------|

|                                                    |        |       |                |         |       |               |         | (hours/week) |                |         |
|----------------------------------------------------|--------|-------|----------------|---------|-------|---------------|---------|--------------|----------------|---------|
|                                                    | n      | Mean  | 95% CI         | p-value | Mean  | 95% CI        | p-value | Mean         | 95% CI         | p-value |
| Gender                                             |        |       |                | 0.072   |       |               | 0.018   |              |                | 0.013   |
| Male                                               | 8,677  | 0.20  | 0.04 to 0.37   |         | 0.14  | 0.07 to 0.21  |         | -0.47        | -0.53 to -0.40 |         |
| Female                                             | 9,417  | 0.42  | 0.25 to 0.59   |         | 0.27  | 0.19 to 0.34  |         | -0.59        | -0.65 to -0.52 |         |
| Age (years)                                        |        |       |                | <0.0001 |       |               | <0.0001 |              |                | <0.0001 |
| 45-55                                              | 6,581  | 0.19  | 0.01 to 0.38   |         | 0.07  | -0.01 to 0.15 |         | -0.17        | -0.24 to -0.10 |         |
| >55-65                                             | 5,960  | 0.76  | 0.56 to 0.96   |         | 0.38  | 0.30 to 0.47  |         | -0.72        | -0.80 to -0.64 |         |
| >65                                                | 5,553  | -0.12 | -0.36 to 0.12  |         | 0.17  | 0.06 to 0.27  |         | -0.86        | -0.95 to -0.77 |         |
| Country of birth (missing=146)                     |        |       |                | 0.082   |       |               | 0.164   |              |                | 0.27    |
| English speaking countries                         | 15,282 | 0.37  | 0.24 to 0.49   |         | 0.22  | 0.16 to 0.28  |         | -0.51        | -0.56 to -0.47 |         |
| Europe                                             | 1,213  | 0.12  | -0.37 to 0.61  |         | 0.21  | -0.01 to 0.42 |         | -0.66        | -0.85 to -0.48 |         |
| Middle East                                        | 192    | -0.18 | -1.43 to 1.07  |         | -0.30 | -0.85 to 0.24 |         | -0.87        | -1.34 to -0.39 |         |
| Asia                                               | 825    | -0.42 | -0.97 to 0.14  |         | 0.01  | -0.24 to 0.25 |         | -0.57        | -0.78 to -0.36 |         |
| Other                                              | 438    | 0.22  | -0.54 to 0.97  |         | 0.18  | -0.15 to 0.51 |         | -0.41        | -0.70 to -0.11 |         |
| Highest level of education completed (missing=206) |        |       |                | 0.496   |       |               | 0.158   |              |                | <0.0001 |
| University/TAFE <sup>5</sup>                       | 10,491 | 0.27  | 0.12 to 0.42   |         | 0.16  | 0.09 to 0.22  |         | -0.41        | -0.46 to -0.35 |         |
| High school                                        | 3,306  | 0.46  | 0.18 to 0.74   |         | 0.26  | 0.14 to 0.39  |         | -0.69        | -0.80 to -0.59 |         |
| Did not complete high school                       | 4,091  | 0.32  | 0.05 to 0.59   |         | 0.26  | 0.14 to 0.38  |         | -0.76        | -0.86 to -0.65 |         |
| IRSED                                              |        |       |                | 0.002   |       |               | 0.007   |              |                | 0.123   |
| Least disadvantaged group                          | 3,086  | 0.39  | 0.22 to 0.55   |         | 0.23  | 0.16 to 0.30  |         | -0.50        | -0.57 to -0.44 |         |
| 2 <sup>nd</sup> disadvantaged group                | 3,735  | -0.06 | -0.45 to 0.33  |         | 0.01  | -0.17 to 0.18 |         | -0.69        | -0.84 to -0.54 |         |
| 3 <sup>rd</sup> disadvantaged group                | 3,850  | -0.31 | -0.69 to 0.07  |         | 0.03  | -0.14 to 0.20 |         | -0.55        | -0.69 to -0.40 |         |
| 4 <sup>th</sup> disadvantaged group                | 3,691  | 0.51  | 0.28 to 0.74   |         | 0.30  | 0.20 to 0.41  |         | -0.49        | -0.57 to -0.40 |         |
| Most disadvantaged group                           | 3,732  | 0.37  | -0.16 to 0.89  |         | 0.10  | -0.13 to 0.33 |         | -0.64        | -0.84 to -0.44 |         |
| Physical functional limitation (missing=3,123)     |        |       |                | <0.0001 |       |               | <0.001  |              |                | 0.301   |
| Moderate                                           | 3,546  | -0.48 | -0.73 to -0.24 |         | 0.01  | -0.09 to 0.12 |         | -0.58        | -0.68 to -0.49 |         |
| Minor                                              | 3,768  | 0.10  | -0.13 to 0.33  |         | 0.21  | 0.11 to 0.32  |         | -0.53        | -0.62 to -0.44 |         |
| None                                               | 7,405  | 0.80  | 0.63 to 0.96   |         | 0.29  | 0.21 to 0.36  |         | -0.50        | -0.56 to -0.43 |         |
| Psychological distress (missing=355)               |        |       |                | 0.595   |       |               | 0.716   |              |                | 0.415   |
| No                                                 | 16,900 | 0.32  | 0.20 to 0.44   |         | 0.20  | 0.15 to 0.25  |         | -0.52        | -0.57 to -0.47 |         |
| Yes                                                | 812    | 0.16  | -0.43 to 0.74  |         | 0.25  | -0.01 to 0.51 |         | -0.62        | -0.85 to -0.39 |         |
| Body Mass Index (missing=857)                      |        |       |                | <0.0001 |       |               | <0.0001 |              |                | <0.0001 |
| Under weight                                       | 244    | 0.30  | -0.74 to 1.34  |         | 0.20  | -0.26 to 0.66 |         | -0.54        | -0.94 to -0.14 |         |
| Healthy weight                                     | 7,541  | 0.69  | 0.51 to 0.86   |         | 0.33  | 0.26 to 0.41  |         | -0.63        | -0.69 to -0.56 |         |
| Overweight                                         | 6,852  | 0.25  | 0.07 to 0.44   |         | 0.21  | 0.13 to 0.29  |         | -0.51        | -0.58 to -0.44 |         |
| Obese                                              | 2,547  | -0.83 | -1.15 to -0.50 |         | 0.28  | 0.13 to 0.42  |         | -0.22        | -0.34 to -0.09 |         |
| Greenspace within 500m                             |        |       |                | 0.476   |       |               | 0.354   |              |                | 0.715   |
| 0-5%                                               | 13,762 | 0.34  | 0.21 to 0.48   |         | 0.19  | 0.13 to 0.25  |         | -0.51        | -0.56 to -0.46 |         |
| >5-10%                                             | 2,657  | 0.16  | -0.14 to 0.47  |         | 0.25  | 0.12 to 0.39  |         | -0.55        | -0.67 to -0.43 |         |
| >10-15%                                            | 1,341  | 0.19  | -0.24 to 0.63  |         | 0.23  | 0.03 to 0.42  |         | -0.61        | -0.78 to -0.44 |         |
| >15%                                               | 334    | 0.61  | -0.26 to 1.49  |         | 0.28  | -0.11 to 0.66 |         | -0.50        | -0.83 to -0.17 |         |
| Greenspace within 1km                              |        |       |                | 0.224   |       |               | 0.128   |              |                | 0.951   |
| 0-5%                                               | 10,948 | 0.37  | 0.22 to 0.52   |         | 0.20  | 0.14 to 0.27  |         | -0.52        | -0.58 to -0.46 |         |
| >5-10%                                             | 4,843  | 0.12  | -0.11 to 0.35  |         | 0.15  | 0.05 to 0.25  |         | -0.52        | -0.61 to -0.43 |         |
| >10-15%                                            | 1,497  | 0.29  | -0.13 to 0.70  |         | 0.31  | 0.13 to 0.49  |         | -0.59        | -0.75 to -0.43 |         |
| >15-20%                                            | 451    | 0.52  | -0.22 to 1.26  |         | 0.08  | -0.25 to 0.40 |         | -0.52        | -0.81 to -0.23 |         |
| >20%                                               | 355    | 0.94  | 0.10 to 1.79   |         | 0.59  | 0.22 to 0.96  |         | -0.47        | -0.79 to -0.15 |         |
| Greenspace within 2km                              |        |       |                | 0.477   |       |               | 0.682   |              |                | 0.221   |
| 0-5%                                               | 7,789  | 0.33  | 0.15 to 0.51   |         | 0.16  | 0.08 to 0.24  |         | -0.55        | -0.62 to -0.48 |         |
| >5-10%                                             | 6,980  | 0.21  | 0.02 to 0.40   |         | 0.23  | 0.15 to 0.32  |         | -0.50        | -0.57 to -0.43 |         |
| >10-15%                                            | 2,157  | 0.44  | 0.10 to 0.78   |         | 0.25  | 0.10 to 0.40  |         | -0.53        | -0.65 to -0.40 |         |
| >15-20%                                            | 688    | 0.46  | -0.14 to 1.06  |         | 0.14  | -0.13 to 0.40 |         | -0.36        | -0.59 to -0.13 |         |
| >20%                                               | 480    | 0.75  | 0.03 to 1.48   |         | 0.36  | 0.04 to 0.68  |         | -0.77        | -1.04 to -0.49 |         |

305 <sup>1</sup>Mean adjusted for baseline amount of time spent on MVPA per week.

306 <sup>2</sup>Mean adjusted for baseline amount of time spent on walking per week.

307 <sup>3</sup>Mean adjusted for baseline amount of time spent on sitting per week.

308 Baseline correlates of the outcomes

309  
310 Table 2 presents the outcome variables at baseline by type 2 diabetes group. The  
311 amount of time spent on MVPA at baseline was significantly higher among the “No  
312 type 2 diabetes” group. There were no significant differences in the amount of time  
313 spent on walking and sitting between New type 2 diabetes and No type 2 diabetes.

314 Table 2: Outcome variables at baseline by type 2 diabetes status

|                         | New type 2 diabetes |      |                        | No type 2 diabetes |      |                        | Kruskal-Wallis,<br>p-value |
|-------------------------|---------------------|------|------------------------|--------------------|------|------------------------|----------------------------|
|                         | Median              | Mean | Interquartile<br>range | Median             | Mean | Interquartile<br>range |                            |
| MVPA (hours/week)       | 6.00                | 8.13 | 2.52-11.67             | 7.25               | 9.13 | 3.67-13.00             | 0.006                      |
| Walking<br>(hours/week) | 2.00                | 2.99 | 0.50-4.00              | 2.00               | 2.95 | 0.83-4.00              | 0.538                      |
| Sitting (hours/week)    | 5.00                | 5.90 | 4.00-8.00              | 5.00               | 5.83 | 4.00-8.00              | 0.534                      |

315  
316 Although the interactions between access to greenspace and status of type 2  
317 diabetes was not statistically significant for each outcome variable except for the  
318 changes in MVPA with percentage of greenspace within 2km ( $p=0.039$ ), the  
319 differences in trends between status of type 2 diabetes were noted as shown in  
320 Figure 4.

322 Greenspace and outcomes by diagnosis of type 2 diabetes

323 Figure 4 presents marginal mean changes in the amount of walking, MVPA and  
324 sitting, and associated 95% CI by proportion of greenspace. A change in the  
325 outcome variable of greater than zero indicates an increase in that outcome at the  
326 follow-up study relative to the baseline study. Regardless of diabetes status and  
327 buffer size, there were no associations between percentage of greenspace and  
328 changes in amount of walking and sitting. For example, the 95% CI of changes in the  
329 amount of walking overlapped between each category of greenspace regardless of



1  
2  
3 330 buffer size. Although there were no significant changes in amount of walking with the  
4  
5 331 percentage of greenspace, increasing trends were apparent among New type 2  
6  
7 332 diabetes which peaked at >15-20% of greenspace, whereas fairly stable trends were  
8  
9 333 found among No type 2 diabetes. Similar trends were also found for changes in the  
10  
11 334 amount of MVPA.  
12  
13  
14  
15

335

16  
17  
18 336 Among New type 2 diabetes, there was a significant association between the  
19  
20 337 percentage of greenspace within 2km buffer and changes in amount of MVPA. The  
21  
22 338 changes in MVPA at >15-20% of greenspace within 2km was significantly higher  
23  
24 339 than those with <15% of greenspace within 2km. Among No type 2 diabetes, the  
25  
26 340 changes in amount of MVPA remained fairly stable with increasing percentage of  
27  
28 341 greenspace (Figure 4).  
29  
30  
31  
32

342

33  
34  
35  
36 343 For changes in sitting time, there were no significant associations with percentage of  
37  
38 344 greenspace regardless of buffer size. Among New type 2 diabetes, the changes in  
39  
40 345 amount of sitting decreased at percentage of greenspace >10%. Among No type 2  
41  
42 346 diabetes, the changes in amount of sitting significantly decreased at follow-up and  
43  
44 347 remained stable with increasing proportion of greenspace.  
45  
46  
47  
48

348

49  
50  
51 349 Figure 4: Change (with 95% CI) in outcomes by proportion of greenspace (Bonferroni  
52  
53 350 method was applied for multiple comparison)  
54  
55 351  
56 352

57  
58 353 Discussion  
59  
60



1  
2  
3 354 This is the first study to explore environmental influences on the behaviours of  
4  
5 355 people who transition into living with type 2 diabetes. Overall, we found that there  
6  
7 356 was a lack of association between access to greenspace at baseline and change in  
8  
9  
10 357 walking, MVPA, and sitting time. We found no statistically significant interactions  
11  
12 358 between access to greenspace and status of type 2 diabetes for each outcome  
13  
14 359 variable, except for the changes in MVPA with percentage of greenspace within 2km.  
15  
16  
17 360 Although no significant interactions were found, possibly due to the small sample  
18  
19 361 size of those with newly diagnosed type 2 diabetes, the magnitude of changes in  
20  
21 362 walking and MVPA increased as percentage of greenspace increased among New  
22  
23 363 T2D while remain fairly stable among No type 2 diabetes. There was no significant  
24  
25 364 association between greenspace and sitting time with fairly stable trends among both  
26  
27  
28 365 New type 2 diabetes and No type 2 diabetes.  
29  
30

366

34 367 Among participants with newly diagnosed type 2 diabetes, there were gradual  
35  
36 368 increases in walking and MVPA with increasing proportion of greenspace within 1km  
37  
38 369 and 2km buffers. However, these increases in walking and MVPA were no longer  
39  
40 370 evident with >20% greenspace. This may be because around half of the participants  
41  
42 371 with more than 20% of greenspace within a 2km buffer (around 3% of the total  
43  
44 372 sample) live near larger greenspace (area > 1km<sup>2</sup>). These large greenspaces are  
45  
46 373 mainly national parks and nature reserve that may have limited public access points.  
47  
48 374 These areas are often located in suburbs on the outskirts of the city with minimal  
49  
50 375 pedestrian or other infrastructure to facilitate the regular use of greenspace for  
51  
52 376 physical activity<sup>36</sup>. Francis et al suggested that the type and functionality of the  
53  
54 377 greenspace may be a salient factor in addition to quantity<sup>37</sup>.  
55  
56  
57  
58  
59  
60 378

1  
2  
3 379 Furthermore, the lack of association found between greenspace and walking and  
4  
5 380 MVPA may be due to the increased participation in fitness activities taken place  
6  
7 381 outside of neighbourhood greenspace. Such fitness activities include aerobics,  
8  
9 382 fitness, gym activities, Pilates, weight training and yoga.<sup>38</sup> In Australia, fitness centre  
10  
11 383 /gym activities is the second most popular physical recreational activity after  
12  
13 384 walking.<sup>39</sup> Similarly, a Dutch study<sup>15</sup> found no significant association between the  
14  
15 385 amount of greenspace within 1km radius of respondents' home and meeting the  
16  
17 386 Dutch public health recommendation for physical activity possibly due to a high  
18  
19 387 density of fitness centres and so that access to greenspace is not a necessary  
20  
21 388 condition for being physically active.<sup>40</sup>  
22  
23  
24  
25  
26 389

27  
28  
29 390 The weak associations between sitting and proportion of greenspace may be due to  
30  
31 391 the lack of detailed information on the setting and domains of sitting (home, car, work  
32  
33 392 or recreation environment). In the 45 and up study, only total sitting time was  
34  
35 393 measured at both baseline and follow-up. Self-reported total sitting time is subject to  
36  
37 394 substantial measurement errors and does not distinguish occupational and  
38  
39 395 transportation sitting from recreational sitting. Previous studies have found that  
40  
41 396 correlates of sitting differed considerably by domain of sitting.<sup>41</sup> Sperlich et al found  
42  
43 397 a weak association between sitting duration and access to parks and recreation  
44  
45 398 facilities<sup>42</sup> and suggest that research investigating association between sitting time  
46  
47 399 and environment should consider the diverse domains of sitting.<sup>42</sup>  
48  
49  
50  
51

52 400

53  
54  
55 401 Overall, the association between proportion of greenspace and change in physical  
56  
57 402 activity appeared more prominent in New type 2 diabetes than No type 2 diabetes.  
58  
59 403 These findings suggest that greenspace may have more motivating effect on

1  
2  
3 404 physical activity among those newly diagnosed with type 2 diabetes. Diabetes  
4  
5 405 Australia recommends people with type 2 diabetes start with at least thirty minutes of  
6  
7 406 moderate physical activity every day or between sixty and ninety minutes every day  
8  
9 407 if they are trying to lose weight.<sup>43</sup> However, it appears that proximity to greenspace  
10  
11 408 alone may not be sufficient to meet Diabetes Australia recommendations for those  
12  
13 409 with newly diagnosed type 2 diabetes.  
14  
15  
16  
17  
18  
19  
20  
21  
22

23 412 The strengths of this study include a prospective design and a large population-  
24  
25 413 based cohort study. Although diagnostic or clinical information was not available to  
26  
27 414 confirm the diagnosis of type 2 diabetes among participants, in this sample self-  
28  
29 415 reported diagnosis of type 2 diabetes has high sensitivity and specificity compared to  
30  
31 416 hospital administrative data collections.<sup>32</sup> Having outcome measures at two time  
32  
33 417 points only over two to five years has limited our ability to track changes in lifestyle  
34  
35 418 behaviours over longer periods of time.  
36  
37  
38  
39  
40  
41

42 420 A few additional limitations apply. We were not able to differentiate between different  
43  
44 421 domains of MVPA and sitting, such as recreational, transport or occupational  
45  
46 422 physical activity and sitting. We also don't know whether each activity took place  
47  
48 423 within the local greenspace. Further, greenspace included state forests and national  
49  
50 424 parks which may or may not be conducive to walking and MVPA as urban parks and  
51  
52 425 trails. We also could not categorise greenspace into more usable categories, for  
53  
54 426 example, sports fields, bushland, presence of picnic facilities, etc., nor do we have  
55  
56 427 access to the quality of the greenspace. Moreover, although we adjusted for a  
57  
58  
59  
60

1  
2  
3 428 number of important potential confounders, there may yet be some residual  
4  
5 429 confounding. However, we share this limitation with most other published studies on  
6  
7 430 neighbourhoods and health.  
8  
9

10 431

## 11 432 Conclusion

12  
13  
14  
15 433 This study indicates that neighbourhood greenspace is related to active lifestyles  
16  
17 434 only to a very limited extent among people with newly diagnosed type 2 diabetes.  
18  
19 435 This is particularly so when there is moderate amount of greenspace (15-20% of the  
20  
21 436 neighbourhood). Future studies should consider including more comprehensive  
22  
23 437 environmental measures about greenspace and other environmental attributes (e.g.,  
24  
25 438 recreational facilities), more specific measures of physical activity and sedentary  
26  
27 439 behaviour, such as the domain and location of each activity, and the more follow-up  
28  
29 440 measures over longer period of time.  
30  
31  
32  
33  
34  
35  
36

37 441

## 38 442 Acknowledgements

39  
40 443 This research was completed using data collected through the 45 and Up Study  
41  
42 444 ([www.saxinstitute.org.au](http://www.saxinstitute.org.au)). The 45 and Up Study is managed by the Sax Institute in  
43  
44 445 collaboration with major partner Cancer Council NSW; and partners: the National  
45  
46 446 Heart Foundation of Australia (NSW Division); NSW Ministry of Health; NSW  
47  
48 447 Government Family & Community Services – Carers, Ageing and Disability  
49  
50 448 Inclusion; and the Australian Red Cross Blood Service. We thank the many  
51  
52 449 thousands of people participating in the 45 and Up Study.  
53  
54  
55  
56  
57  
58  
59

60 450

## 61 451 Contributors

1  
2  
3 452 Shanley Chong participated in the design of the study, carried out the statistical  
4  
5 453 analyses and drafted the manuscript. Soumya Mazumdar participated in the design  
6  
7 454 of the study, helped draft the manuscript, helped with the interpretation and revised  
8  
9 455 the manuscript. Ding Ding helped draft the manuscript, helped with the interpretation  
10  
11 456 of the data and revised the manuscript. Geoff Morgan, Elizabeth Comino and Adrian  
12  
13 457 Bauman helped with the interpretation of the data and revised the manuscript. Bin  
14  
15 458 Jalaludin supervised the study, helped draft the manuscript, helped with the  
16  
17 459 interpretation of the data and revised the manuscript.  
18  
19  
20  
21  
22  
23  
24

460

#### 461 Funding

462 The research was funded from a NH&MRC Preventative Healthcare and  
463 Strengthening Australia's Social and Economic Fabric Program Grant.  
464

464

#### 465 Competing interests

466 None declared.  
467

467

#### 468 Ethics approval

469 The 45 and Up Study was granted ethical approval by the NSW Population & Health  
470 Services Research Ethic Committee (reference HREC/15/CIOHS/4) and the Cancer  
471 Institute NSW (reference 2015/02/575).  
472

472

#### 473 Data sharing statement

1  
2  
3 474 This research was completed using data collected through the 45 and Up Study  
4  
5 475 (www.saxinstitute.org.au).  
6  
7

8 476 References  
9

- 10  
11 477 1. Mulnier HE, Seaman HE, Raleigh VS, et al. Mortality in people with type 2 diabetes in the UK.  
12 478 *Diabetic medicine : a journal of the British Diabetic Association* 2006;23(5):516-21. doi:  
13 479 10.1111/j.1464-5491.2006.01838.x [published Online First: 2006/05/10]  
14 480 2. Hu G, Jouslahti P, Barengo NC. Physical activity, cardiovascular risk factors, and mortality among  
15 481 Finnish adults with diabetes. *Diabetes Care* 2005;28:799-805.  
16 482 3. Baker IDI Heart & Diabetes Institute. Diabetes: the silent pandemic and its impact on Australia  
17 483 Australia: Baker IDI Heart and Diabetes Institute, 2012.  
18 484 4. Norris SL, Zhang X, Avenell A, et al. Long-term effectiveness of lifestyle and behavioral weight loss  
19 485 interventions in adults with type 2 diabetes: a meta-analysis. *The American journal of*  
20 486 *medicine* 2004;117(10):762-74. doi: 10.1016/j.amjmed.2004.05.024 [published Online First:  
21 487 2004/11/16]  
22 488 5. Klein S, Sheard NF, Pi-Sunyer X, et al. Weight management through lifestyle modification for the  
23 489 prevention and management of type 2 diabetes: rationale and strategies. A statement of the  
24 490 American diabetes association, the North American association for the study of obesity, and  
25 491 the American society for clinical nutrition. *American journal of clinical nutrition*  
26 492 2004;80(2):257-63.  
27 493 6. Tuomilehto J, Lindstrom J, Eriksson JG, et al. Prevention of type 2 diabetes mellitus by changes in  
28 494 lifestyle among subjects with impaired glucose tolerance. *New England Journal of Medicine*  
29 495 2001;344:1343-50.  
30 496 7. Castaneda C, Layne JE, Munoz-Orians L. A randomised controlled trial of resistance exercise  
31 497 training to improve glycemic control in older adults with type 2 diabetes. *Diabetes Care*  
32 498 2002;25:2335-41.  
33 499 8. Australian Diabetes Council. 10 ways to manage diabetes. NSW, Australia: Australian Diabetes  
34 500 Council, 2010.  
35 501 9. Health Canada. Diabetes in Canada: National Statistics and Opportunities for Improved  
36 502 Surveillance, Prevention and Control. Ottawa, Ontario, 1999:1-69.  
37 503 10. Nelson KM, Reiber G, Boyko EJ. Diet and Exercise Among Adults With Type 2 Diabetes. *Findings*  
38 504 *from the Third National Health and Nutrition Examination Survey (NHANES III)*  
39 505 2002;25(10):1722-28. doi: 10.2337/diacare.25.10.1722  
40 506 11. Bauman AE, Reis RS, Sallis JF, et al. Correlates of physical activity: why are some people physically  
41 507 active and others not? *The Lancet* 2012;380(9838):258-71. doi: 10.1016/S0140-  
42 508 6736(12)60735-1  
43 509 12. Ding D, Gebel K. Built environment, physical activity, and obesity: What have we learned from  
44 510 reviewing the literature? *Health Place* 2012;18(1):100-05. doi:  
45 511 <https://doi.org/10.1016/j.healthplace.2011.08.021>  
46 512 13. Sundquist K, Eriksson U, Mezuk B, et al. Neighborhood walkability, deprivation and incidence of  
47 513 type 2 diabetes: a population-based study on 512,061 Swedish adults. *Health Place*  
48 514 2015;31:24-30. doi: 10.1016/j.healthplace.2014.10.011 [published Online First: 2014/12/03]  
49 515 14. Thomas N, Alder E, Leese GP. Barriers to physical activity in patients with diabetes. *Postgraduate*  
50 516 *Medical Journal* 2004;80(943):287-91.  
51 517 15. Maas J, Verheij R, Spreeuwenberg P, et al. Physical activity as a possible mechanism behind the  
52 518 relationship between green space and health: A multilevel analysis. *BMC Public Health*  
53 519 2008;8(1):206.  
54  
55  
56  
57  
58  
59  
60

1  
2  
3  
4  
5  
6  
7  
8  
9  
10  
11  
12  
13  
14  
15  
16  
17  
18  
19  
20  
21  
22  
23  
24  
25  
26  
27  
28  
29  
30  
31  
32  
33  
34  
35  
36  
37  
38  
39  
40  
41  
42  
43  
44  
45  
46  
47  
48  
49  
50  
51  
52  
53  
54  
55  
56  
57  
58  
59  
60

- 520 16. Hillsdon M, Panter J, Foster C, et al. The relationship between access and quality of urban green  
521 space with population physical activity. *Public Health* 2006;120(12):1127-32. doi:  
522 10.1016/j.puhe.2006.10.007 [published Online First: 2006/10/28]
- 523 17. Bedimo-Rung AL, Mowen AJ, Cohen DA. The significance of parks to physical activity and public  
524 health: a conceptual model. *Am J Prev Med* 2005;28 doi: 10.1016/j.amepre.2004.10.024
- 525 18. Greenspace Scotland. Health impact assessment of greenspace: a guide. In: scotland g, ed.  
526 Stirling, 2008.
- 527 19. Coombes E, Jones AP, Hillsdon M. The relationship of physical activity and overweight with  
528 objectively measured green space accessibility and use. *Social Science and Medicine*  
529 2010;70(6):816-22.
- 530 20. McCormack GR, Rock M, Toohey AM, et al. Characteristics of urban parks associated with park  
531 use and physical activity: a review of qualitative research. *Health Place* 2010;16:712-26.
- 532 21. Sigal RJ, Kenny GP, Wasserman DH, et al. Physical Activity/Exercise and Type 2 Diabetes. A  
533 consensus statement from the American Diabetes Association 2006;29(6):1433-38. doi:  
534 10.2337/dc06-9910
- 535 22. Schneider KL, Andrews C, Hovey KM, et al. Change in physical activity after a diabetes diagnosis:  
536 opportunity for intervention. *The official journal of the American College of Sports Medicine*  
537 2014;46(1):84-91.
- 538 23. Penn L, Moffatt SM, White M. Participants' perspective on maintaining behaviour change: a  
539 qualitative study within the European Diabetes Prevention Study. *BMC Public Health*  
540 2008;8(235):1-11.
- 541 24. Sax Institute. Guidelines for authors regarding technical review of 45 and Up Study papers 2015  
542 2015 [Available from: [http://saxinstitute.org.au/wp-content/uploads/Guidelines-for-](http://saxinstitute.org.au/wp-content/uploads/Guidelines-for-authors-regarding-technical-review-of-45-and-Up-Study-papers.pdf)  
543 [authors-regarding-technical-review-of-45-and-Up-Study-papers.pdf](http://saxinstitute.org.au/wp-content/uploads/Guidelines-for-authors-regarding-technical-review-of-45-and-Up-Study-papers.pdf) accessed 11th January,  
544 2016 2016.
- 545 25. Sax Institute. Questionnaire. 2016.
- 546 26. Feeney K. NSW Walking Strategy. Literature Review. Australia, 2011.
- 547 27. Ding D, Rogers K, van der Ploeg H, et al. Traditional and Emerging Lifestyle Risk Behaviors and All-  
548 Cause Mortality in Middle-Aged and Older Adults: Evidence from a Large Population-Based  
549 Australian Cohort. *PLOS Medicine* 2015;12(12):e1001917. doi:  
550 10.1371/journal.pmed.1001917
- 551 28. Australian Institute of Health and Welfare. The Active Australia Survey: a guide and manual for  
552 implementation, analysis and reporting. Canberra: Australian Institute of Health and Welfare  
553 (AIHW), 2003.
- 554 29. Brown WJ, Trost SG, Bauman A, et al. Test-retest reliability of four physical activity measures  
555 used in population surveys. *Journal of science and medicine in sport / Sports Medicine*  
556 *Australia* 2004;7(2):205-15. [published Online First: 2004/09/15]
- 557 30. Heesch KC, Hill RL, van Uffelen JG, et al. Are Active Australia physical activity questions valid for  
558 older adults? *Journal of science and medicine in sport / Sports Medicine Australia*  
559 2011;14(3):233-7. doi: 10.1016/j.jsams.2010.11.004 [published Online First: 2011/02/01]
- 560 31. Bauman A. TRENDS IN EXERCISE PREVALENCE IN AUSTRALIA. *Community Health Studies*  
561 1987;11(3):190-96. doi: 10.1111/j.1753-6405.1987.tb00005.x
- 562 32. Comino EJ, Tran DT, Haas M, et al. Validating self-report of diabetes use by participants in the 45  
563 and Up Study: a record linkage study. *BMC Health Serv Res* 2013;13:481. doi: 10.1186/1472-  
564 6963-13-481 [published Online First: 2013/11/20]
- 565 33. ABS. National Health Survey: Summary or results, Australia 2004-05. Canberra, 2006.
- 566 34. Stewart. A, Kamberg. CJ. Measuring functioning and well-being: The Medical Outcomes Study  
567 approach. . North Carolina: Duke University 1992.
- 568 35. Brooks RT, Beard J, Steel Z. Factor structure and interpretation of the K10. *Psychol Assess*  
569 2006;18(1):62-70. doi: 10.1037/1040-3590.18.1.62 [published Online First: 2006/04/06]



- 1  
2  
3 570 36. Latham M. Urban Policy and the Environment in Western Sydney. *The Australian Quarterly*  
4 571 1992;64(1):71-81. doi: 10.2307/20635662  
5 572 37. Francis J, Wood LJ, Knuiiman M, et al. Quality or quantity? Exploring the relationship between  
6 573 Public Open Space attributes and mental health in Perth, Western Australia. *Soc Sci Med*  
7 574 2012;74(10):1570-77. doi: <http://dx.doi.org/10.1016/j.socscimed.2012.01.032>  
8 575 38. ABS. Perspectives on Sport, May 2009 Canberra, Australia: ABS, 2009.  
9 576 39. ABS. Participation in Sport and Physical Recreation 2009-10. Canberra: ABS, 2016.  
10 577 40. Maas J, Verheij RA, Spreeuwenberg P, et al. Physical activity as a possible mechanism behind the  
11 578 relationship between green space and health: a multilevel analysis. *BMC Public Health*  
12 579 2008;8:206. doi: 10.1186/1471-2458-8-206 [published Online First: 2008/06/12]  
13 580 41. O'Donoghue G, Perchoux C, Mensah K, et al. A systematic review of correlates of sedentary  
14 581 behaviour in adults aged 18–65 years: a socio-ecological approach. *BMC Public Health*  
15 582 2016;16(1):163. doi: 10.1186/s12889-016-2841-3  
16 583 42. Wallmann-Sperlich B, Bucksch J, Hansen S, et al. Sitting time in Germany: an analysis of socio-  
17 584 demographic and environmental correlates. *BMC Public Health* 2013;13(196)  
18 585 43. Diabetes Australia. Physical activity & type 2 diabetes. *Talking diabetes A diabetes information*  
19 586 *series from Diabetes NSW* 2012; 27. [http://diabetesnsw.com.au/wp-](http://diabetesnsw.com.au/wp-content/uploads/2014/12/DA-27-Physical-health-and-diabetes.pdf)  
20 587 [content/uploads/2014/12/DA-27-Physical-health-and-diabetes.pdf](http://diabetesnsw.com.au/wp-content/uploads/2014/12/DA-27-Physical-health-and-diabetes.pdf) (accessed 20-12-2016).  
21  
22  
23  
24 588  
25  
26  
27 589  
28  
29  
30 590  
31  
32  
33 591  
34  
35 592  
36  
37  
38 593  
39  
40  
41 594  
42  
43  
44 595  
45  
46  
47 596  
48  
49 597  
50  
51  
52  
53  
54  
55  
56  
57  
58  
59  
60



1  
2  
3  
4  
5  
6  
7  
8  
9  
10  
11  
12  
13  
14  
15  
16  
17  
18  
19  
20  
21  
22  
23  
24  
25  
26  
27  
28  
29  
30  
31  
32  
33  
34  
35  
36  
37  
38  
39  
40  
41  
42  
43  
44  
45  
46  
47  
48  
49  
50  
51  
52  
53  
54  
55  
56  
57  
58  
59  
60

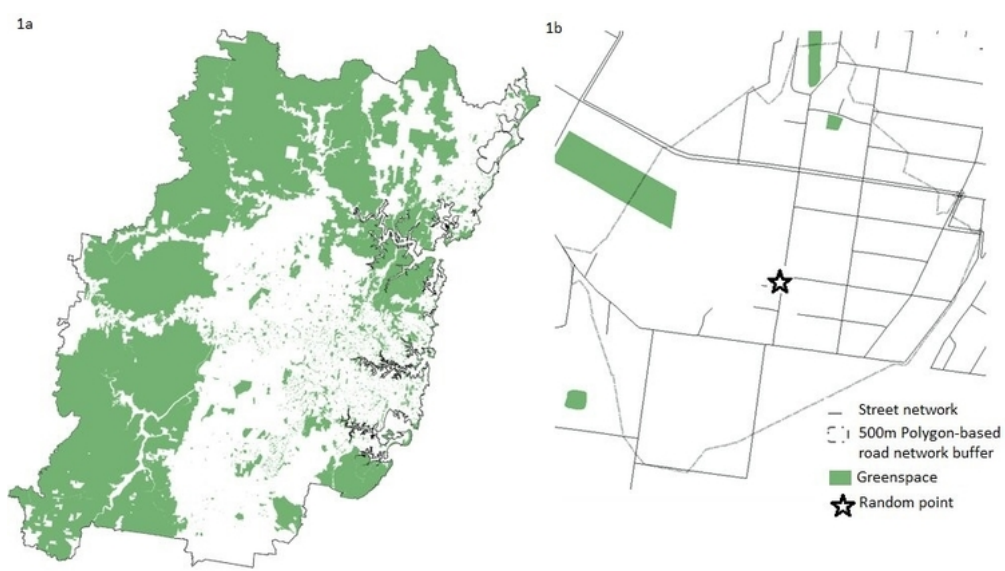

31x17mm (600 x 600 DPI)

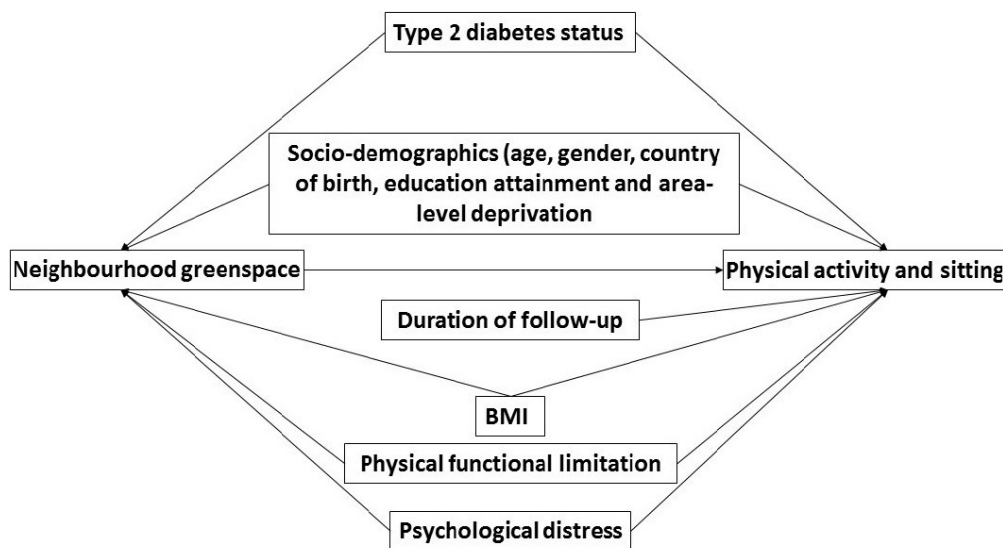

89x49mm (300 x 300 DPI)

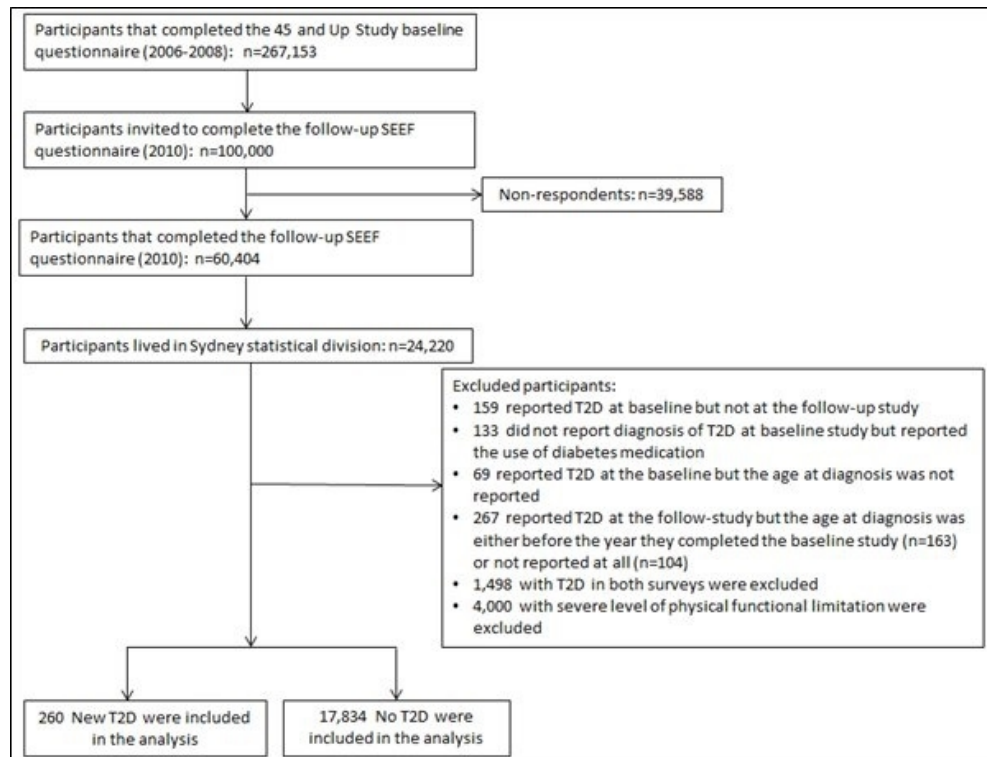

51x39mm (300 x 300 DPI)

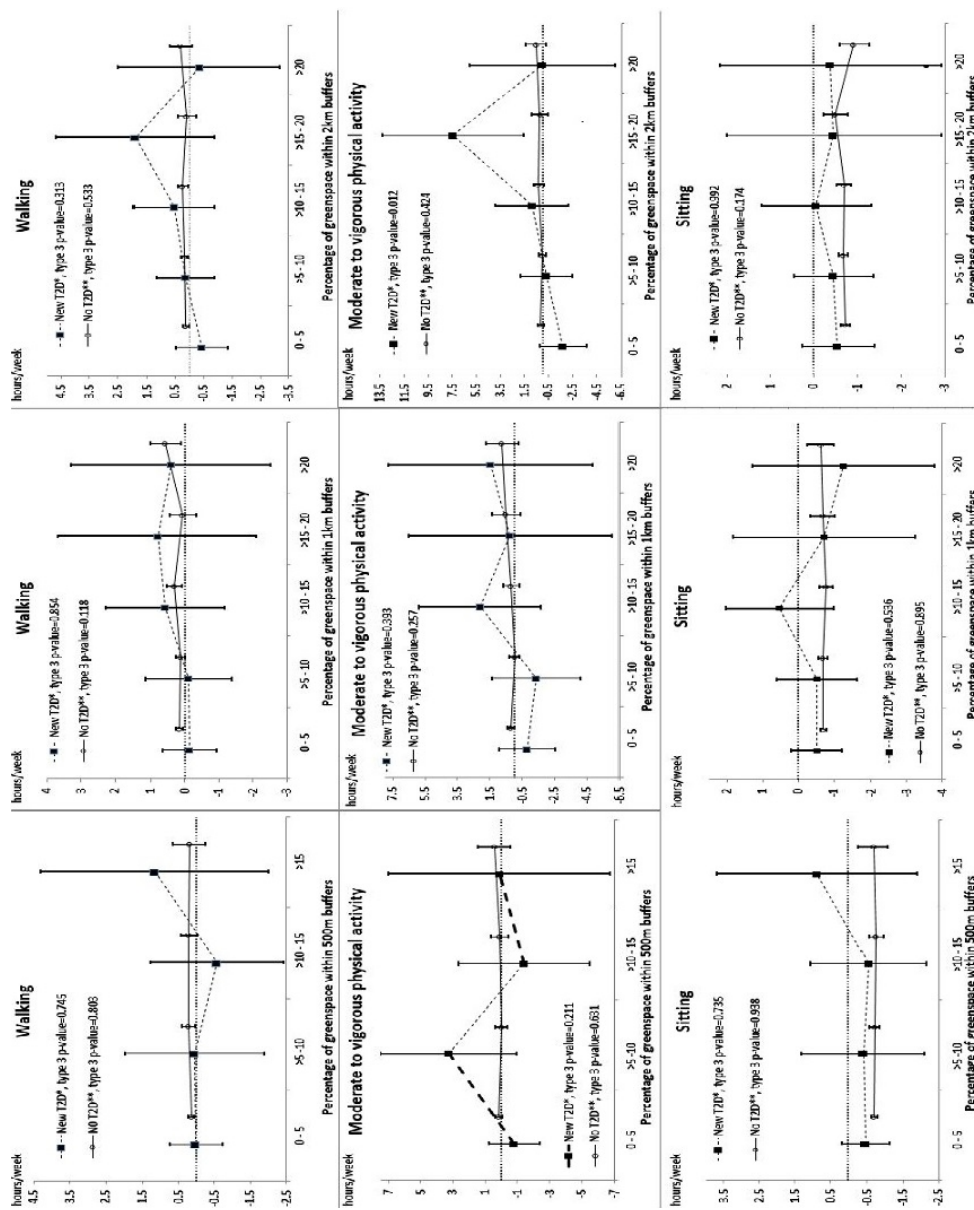

74x90mm (300 x 300 DPI)

# BMJ Open

## Neighbourhood greenspace and physical activity and sedentary behaviour among older adults with a recent diagnosis of type 2 diabetes: A Prospective analysis

|                                 |                                                                                                                                                                                                                                                                                                                                                                                                                                                      |
|---------------------------------|------------------------------------------------------------------------------------------------------------------------------------------------------------------------------------------------------------------------------------------------------------------------------------------------------------------------------------------------------------------------------------------------------------------------------------------------------|
| Journal:                        | <i>BMJ Open</i>                                                                                                                                                                                                                                                                                                                                                                                                                                      |
| Manuscript ID                   | bmjopen-2019-028947.R2                                                                                                                                                                                                                                                                                                                                                                                                                               |
| Article Type:                   | Original research                                                                                                                                                                                                                                                                                                                                                                                                                                    |
| Date Submitted by the Author:   | 18-Oct-2019                                                                                                                                                                                                                                                                                                                                                                                                                                          |
| Complete List of Authors:       | Chong, Shanley; South Western Sydney Local Health District; University of New South Wales, Western Sydney Clinical School<br>Mazumdar, Soumya; South Western Sydney Local Health District<br>Ding, Ding; University of Sydney<br>Morgan, Geoff; University of Sydney<br>Comino, Elizabeth; University of New South Wales<br>Bauman, Adrian; University of Sydney<br>Jalaludin, Bin; South Western Sydney Local Health District; University of Sydney |
| <b>Primary Subject Heading</b>: | Diabetes and endocrinology                                                                                                                                                                                                                                                                                                                                                                                                                           |
| Secondary Subject Heading:      | Diabetes and endocrinology                                                                                                                                                                                                                                                                                                                                                                                                                           |
| Keywords:                       | physical activity, diabetes, green space                                                                                                                                                                                                                                                                                                                                                                                                             |
|                                 |                                                                                                                                                                                                                                                                                                                                                                                                                                                      |

SCHOLARONE™  
Manuscripts

1  
2  
3 1 Full title: Neighbourhood greenspace and physical activity and sedentary behaviour  
4  
5 2 among older adults with a recent diagnosis of type 2 diabetes: A Prospective  
6  
7 3 analysis  
8  
9

10 4  
11  
12  
13 5 Shanley Chong, PhD  
14  
15

16 6 Affiliation: Population Health Intelligence, Healthy People & Places Unit Population  
17  
18 7 Health, South Western Sydney Local Health District, New South Wales, Australia.  
19  
20  
21 8 South Western Sydney Clinical School, University of New South Wales, New South  
22  
23 9 Wales, Australia.  
24  
25

26 10  
27  
28  
29 11 Soumya Mazumdar, PhD  
30  
31

32 12 Affiliation: Population Health Intelligence, Healthy People & Places Unit Population  
33  
34 13 Health, South Western Sydney Local Health District, New South Wales, Australia.  
35  
36  
37 14 South Western Sydney Clinical School, University of New South Wales, New South  
38  
39 15 Wales, Australia.  
40  
41

42 16  
43  
44  
45 17 Ding Ding, PhD  
46  
47

48 18 Affiliation: Prevention Research Collaboration, Sydney School of Public Health,  
49  
50 19 University of Sydney, Camperdown, New South Wales, Australia.  
51  
52

53 20 Charles Perkins Centre, University of Sydney, Camperdown, New South Wales,  
54  
55 21 Australia.  
56  
57

58 22 Geoff Morgan, PhD  
59  
60

1  
2  
3 23 Affiliation: University Centre for Rural Health, School of Public Health, University of  
4  
5 24 Sydney, New South Wales, Australia.  
6  
7

8 25  
9

10  
11 26 Elizabeth Comino, Phd  
12

13  
14 27 Ingham Institute Applied Medical ResearchLiverpool BC, New South Wales,  
15  
16 28 Australia.  
17

18  
19 29 Centre for Health, Equity, Training, Research and Evaluation (CHETRE), University  
20  
21 30 of New South Wales, New South Wales, Australia.  
22

23  
24 31 Australia Research Centre for Primary Health Care and Equity, A Unit of Population  
25  
26 32 Health, South Western Sydney Local Health District, NSW HealthSydney, New  
27  
28 33 South Wales, Australia.  
29

30  
31 34  
32

33  
34 35 Adrian Bauman, Phd  
35

36  
37 36 Affiliation: Prevention Research Collaboration, Sydney School of Public Health,  
38  
39 37 University of Sydney, Camperdown, New South Wales, Australia.  
40

41  
42 38 Charles Perkins Centre, University of Sydney, Camperdown, New South Wales,  
43  
44 39 Australia.  
45

46  
47 40  
48

49  
50 41 Bin Jalaludin, Phd  
51

52  
53 42 Affiliation: Population Health Intelligence, Healthy People & Places Unit Population  
54  
55 43 Health, South Western Sydney Local Health District, New South Wales, Australia.  
56  
57  
58  
59  
60

1  
2  
3  
4  
5  
6  
7  
8  
9  
10  
11  
12  
13  
14  
15  
16  
17  
18  
19  
20  
21  
22  
23  
24  
25  
26  
27  
28  
29  
30  
31  
32  
33  
34  
35  
36  
37  
38  
39  
40  
41  
42  
43  
44  
45  
46  
47  
48  
49  
50  
51  
52  
53  
54  
55  
56  
57  
58  
59  
60

44 School of Public Health and Community Medicine, University of New South Wales,  
45 New South Wales, Australia.

46

47 Corresponding author:

48 Bin Jalaludin

49 Locked Bag 7279, LIVERPOOL NSW 1871, Australia

50 Tel: +61287386093

51 Fax: +61287386884

52 Email: [Bin.Jalaludin@health.nsw.gov.au](mailto:Bin.Jalaludin@health.nsw.gov.au)

53

54

55

56

57

58

59

60

61

62

63

64

For peer review only



1  
2  
3 65 Abstract  
4

5  
6 66 Objectives:  
7

8  
9 67 Greenspace is one of the important factors that can promote an active lifestyle.

10  
11 68 Thus, greener surroundings may be a motivating factor for people with newly

12  
13 69 diagnosed diabetes to engage in more physical activity. Given that diagnosis of type

14  
15 70 2 diabetes (T2D) may serve as a window opportunity for behavioural modification,

16  
17 71 we hypothesise that the association between neighbourhood greenspace and

18  
19 72 physical activity among people with newly diagnosed T2D may be greater than those

20  
21 73 not diagnosed with T2D. The aim of this study was to investigate the association

22  
23 74 between access to greenspace and changes in physical activity and sedentary

24  
25 75 behaviour, and whether these associations differed by T2D.  
26  
27

28  
29 76 Design: Prospective cohort.  
30

31  
32 77 Setting: New South Wales, Australia  
33  
34

35  
36 78 Methods:  
37

38  
39 79 We used self-reported information from the New South Wales 45 and Up Study

40  
41 80 (baseline) and a follow-up study. Information on sitting, walking and moderate to

42  
43 81 vigorous physical activity was used as outcomes. The proportion of greenspace

44  
45 82 within 500m, 1km and 2km road network buffers around participant's residential

46  
47 83 address was generated as a proxy measure for access to greenspace. The

48  
49 84 association between the access to greenspace and the outcomes were explored

50  
51 85 among the newly diagnosed T2D group and those without T2D.  
52  
53

54  
55 86 Results:  
56

57  
58 87 Among New T2D, although no significant changes were found in the amount of

59  
60 88 walking with the percentage of greenspace, increasing trends were apparent. There

1  
2  
3 89 was no significant association between the percentage of greenspace and changes  
4  
5 90 in amount of MVPA. Among No T2D, there were no significant associations between  
6  
7 91 the amount of MVPA and walking, and percentage of greenspace. For changes in  
8  
9 92 sitting time, there were no significant associations with percentage of greenspace  
10  
11 93 regardless of buffer size.  
12  
13  
14

15 94

#### 17 95 Conclusions:

18  
19 96 In this study, there was no association between access to greenspace at baseline  
20  
21 97 and change in walking, MVPA, and sitting time, regardless of T2D status.  
22  
23  
24

#### 25 98 Strengths and Limitations of this study

- 26  
27 99
- 28 100 • This is the first study to explore environmental influences on the behaviours of  
29 101 people who transition into living with T2D, and compare its association with  
30 102 those without T2DM.  
31  
32 103 • This is a large population-based cohort with data available at two time points.  
33  
34 104 • A limitation is that the change in duration of physical activity and sitting were  
35  
36 105 calculated from self-reported surveys.  
37  
38  
39  
40  
41  
42  
43  
44  
45  
46  
47  
48  
49

106

107

108

#### 109 Introduction

110 Type 2 diabetes (T2D) is a lifelong condition and is associated with increased risk for  
111 cardiovascular, renal disease<sup>1</sup> and mortality.<sup>2,3</sup> A healthy lifestyle that includes, for  
example, regular physical activity, can help maintain healthy blood glucose levels

1  
2  
3 112 and reduce the risk of complications of T2D.<sup>4-7</sup> However, only about half of  
4  
5 113 Australians with diabetes achieve adequate control of their blood glucose level.<sup>3</sup>  
6  
7  
8 114

9  
10 115 It is recommended that adults, including those diagnosed with T2D engage in at  
11  
12 116 least 30 minutes of physical activity every day.<sup>8</sup> In a population-based study in  
13  
14 117 Australia, participants with incident T2D reported lack of changes in their walking and  
15  
16 118 moderate to vigorous physical activity (MVPA) after their diagnosis. Studies reported  
17  
18 119 that 60% of people aged 35-64 years with diabetes (types 1 and 2) were not  
19  
20 120 achieving the recommended level of physical activity,<sup>9</sup> one third of adults with T2D  
21  
22 121 were completely inactive<sup>10</sup> and only a third exercised on regular basis.<sup>10</sup> Physical  
23  
24 122 activity behaviour is determined by a range of biological, psychosocial and  
25  
26 123 environmental factors.<sup>11</sup> Built environment attributes are frequently found to be  
27  
28 124 associated with physical activity,<sup>12</sup> and activity-unfriendly environments may be  
29  
30 125 associated with higher T2D incidence.<sup>13</sup> For example, a study reported that one of  
31  
32 126 the barriers among inactive patients with diabetes (both type 1 and 2) was lack of  
33  
34 127 local facilities.<sup>14</sup>  
35  
36  
37  
38  
39  
40  
41 128

42  
43 129 One environmental attribute that plays an important role in physical activity is  
44  
45 130 greenspace.<sup>15-17</sup> Greenspace is defined as any vegetated land adjoining an urban  
46  
47 131 area which includes bushland, nature reserves, national parks, outdoor sports fields,  
48  
49 132 school playgrounds and rural or semi-rural areas immediately adjoining an urban  
50  
51 133 area.<sup>18</sup> Several studies have found that people who have better access to parks and  
52  
53 134 green spaces are more likely to report that they engage in physical activity.<sup>19 20</sup> The  
54  
55 135 potential mechanism for these associations may be that greenspace prompts,  
56  
57 136 facilitates, and reinforces location-specific physical activity,<sup>21</sup> while simultaneously  
58  
59  
60

1  
2  
3 137 discouraging sedentary lifestyles . Thus, greener surroundings may be a motivating  
4  
5 138 factor among people with newly diagnosed diabetes to engage in more physical  
6  
7 139 activity. Given that diagnosis of T2D may serve as a window opportunity for  
8  
9  
10 140 behavioural modification,<sup>22 23</sup> we hypothesise that the association between  
11  
12 141 neighbourhood greens pace and physical activity among people with newly  
13  
14 142 diagnosed T2D may be greater than those never diagnosed with type 2 diabetes.  
15  
16

17 143

18  
19  
20 144 Using data from a large cohort study in New South Wales (NSW), Australia, we  
21  
22 145 aimed to investigate the associations between the access to neighbourhood  
23  
24 146 greenspace and changes in physical activity and sitting time by T2D diagnosis  
25  
26 147 status.  
27  
28

29 148

## 30 31 32 149 Materials and Method

### 33 34 35 150 Study population

36  
37  
38 151 The study area was the Sydney Statistical Division (Figure 1a) which has a  
39  
40 152 population of approximately 4.12 million people and covers an area of 12,428 square  
41  
42 153 kilometres. It is the largest urban agglomeration in Australia, with a wide range of  
43  
44 154 environmental features and diverse sociodemographic characteristics.  
45  
46

47 155 Information about physical activity and relevant covariates at the individual level was  
48  
49 156 obtained from the baseline 45 and Up Study and the Social, Economic and  
50  
51 157 Environmental Factors (SEEF) follow-up Study. The 45 and Up Study is a  
52  
53 158 population-based cohort survey of NSW residents aged 45 years and older.  
54  
55

56  
57 159 Recruitment was undertaken between 2006 and 2009. Potential participants were  
58  
59 160 randomly selected from the Medicare Australia database (Australia's universal public  
60

1  
2  
3 161 health insurance system). Participants joined the study by completing a mailed self-  
4  
5 162 administered questionnaire and providing consent for long-term follow-up, including  
6  
7 163 linkage to various personal health records. The response rate was 18% and  
8  
9 164 participants comprised 11% of the NSW population aged 45 years and over.<sup>24</sup> The  
10  
11 165 full study cohort consists of 267,153 people aged 45 years or older at the time of  
12  
13 166 recruitment.  
14  
15  
16  
17  
18  
19

20 168 Figure 1: Sydney statistical division (1a) and 500m polygon-based network buffer  
21  
22 169 (1b).  
23  
24

25 170 In 2010, the SEEF Study questionnaire was distributed to the first 100,000  
26  
27 171 participants of the 45 and Up Study, of whom 60,404 returned the completed  
28  
29 172 questionnaire. The average follow-up period was  $3.3 \pm 0.9$  years (median=2.8 years,  
30  
31 173 inter-quartile range=2.6 to 4.6 years). Questionnaires for both the 45 and Up and the  
32  
33 174 SEEF Study are available from the Sax Institute website. Of the 60,404 participants,  
34  
35 175 24,220 resided in the study area at the time of the baseline 45 and Up Study.  
36  
37  
38  
39

40 176  
41  
42 177 The baseline 45 and Up Study and the SEEF Study were approved by the University  
43  
44 178 of New South Wales Human Research Ethics Committee and the University of  
45  
46 179 Sydney Human Research Ethics Committee respectively.  
47  
48  
49

50 180 Measures

51  
52 181 *Exposure: access to greenspace*

53  
54  
55 182 We used the percentage of greenspace within 500m, 1km and 2km polygon-based  
56  
57 183 road network (PBRN) buffers (Figure 1b) around participants' residences (available  
58  
59  
60

1  
2  
3 184 for the baseline survey only) as proxies for geographic access to greenspace. These  
4  
5 185 buffer sizes were chosen as they are considered as walkable distance.<sup>25</sup>  
6  
7  
8 186  
9  
10 187 Greenspace data was obtained from StreetPro (PitneyBowers Inc., USA). In this  
11  
12 188 dataset, greenspace includes national parks, nature reserves, historic sites, state  
13  
14 189 forests, State recreation areas, wildlife refuges, conservation parks, protected areas,  
15  
16  
17 190 wildlife reserves, urban recreation parks and other urban greenspaces. The PBRN  
18  
19 191 buffers were created using the StreetPro Navigation (PitneyBowers Inc., USA) road  
20  
21 192 network file and ArcGIS network analyst to calculate the endpoints of all possible  
22  
23 193 routes up to the specified distance (500m, 1km and 2km) along the road network for  
24  
25 194 each participant's residence. The endpoints were then connected to form irregular  
26  
27 195 polygons. Percentage of greenspace within PBRN buffers were categorised into 0-  
28  
29 196 5%, >5-10%, >10-15%, >15-20% and >20%. We combined >15-20% and >20% for  
30  
31 197 greenspace within 500m buffers due to the small sample sizes.  
32  
33  
34  
35 198

### 37 199 *Outcomes: duration of sitting and physical activity*

39  
40 200 Information on sitting (hours per week), walking (minutes per week) and MVPA  
41  
42 201 (minutes per week) was collected in both surveys. Duration of sitting was adapted  
43  
44 202 from the International Physical Activity Questionnaire which has acceptable  
45  
46 203 reliability<sup>26</sup> and validity.<sup>26</sup> Physical activity was assessed using the Active Australia  
47  
48 204 Survey<sup>27</sup> which also has acceptable reliability<sup>28</sup> and validity.<sup>29</sup> In this instrument,  
49  
50 205 walking is defined as walking for recreation or exercise or to get to or from places.  
51  
52 206 Vigorous physical activity refers to any activity that causes a participant to breathe  
53  
54 207 harder or puff and pant. Moderate physical activity refers to less intense activities  
55  
56 208 such as gentle swimming, social tennis, vigorous gardening or work around the  
57  
58  
59  
60

1  
2  
3 209 house. Total weighted minutes of MVPA per week is calculated by the sum of  
4  
5 210 minutes of walking, moderate physical activity and twice the minutes of vigorous  
6  
7 211 physical activity.<sup>28</sup> Reported time spent on walking and MVPA greater than 14 hours  
8  
9 212 per day was considered as an impossible value and recoded to 14 hours.<sup>30</sup> We  
10  
11 213 conceptualised walking and total MVPA as two separate outcomes because walking  
12  
13 214 is expected to be more specifically related to neighbourhood greenspace while total  
14  
15 215 MVPA is commonly used as a measure of overall levels of health-enhancing physical  
16  
17 216 activity.  
18  
19  
20  
21  
22  
23  
24

### 25 218 *T2D diagnosis*

26  
27 219 New cases of T2D were defined as those participants who did not report T2D at the  
28  
29 220 baseline survey but reported T2D at the follow-up survey (New type 2 diabetes). The  
30  
31 221 comparator group was participants who did not report T2D at both baseline and  
32  
33 222 follow-up surveys (No type 2 diabetes). The questions asked to determine a  
34  
35 223 diagnosis of T2D at the baseline survey were “Has a doctor ever told you that you  
36  
37 224 have diabetes” and “Have you taken Diabex, Diaformin, Metformin for most of the  
38  
39 225 last 4 weeks”.  
40  
41  
42  
43  
44  
45  
46

47 227 Participants who reported that they had been told by a doctor that they had diabetes  
48  
49 228 were then also asked about their age at diagnosis. For participants with newly  
50  
51 229 diagnosed type 2 diabetes, the time lapse since diagnosis to completion of the SEEF  
52  
53 230 Study questionnaire was also calculated (age at time of completion of SEEF Study  
54  
55 231 questionnaire minus age at T2D diagnosis). Self-reported diagnosis of T2D in the 45  
56  
57  
58  
59  
60

1  
2  
3 232 and Up Study has high sensitivity (83.7%) and specificity (97.7%) compared to  
4  
5 233 administrative hospitalisation data<sup>31</sup>.

6  
7  
8 234

9  
10  
11 235 *Covariates*

12  
13  
14 236 A directed acyclic graph (DAG) was used to identify potential covariates (Figure 2),  
15  
16 237 measured at baseline, to predict physical activity and duration of sitting. The list of  
17  
18 238 covariates, reported at baseline, include socio-demographic characteristics (age,  
19  
20 239 gender, country of birth (English speaking countries, Europe, Middle-East, Asia,  
21  
22 240 Other)) and an area-level deprivation score. Area-level deprivation was measured by  
23  
24 241 the 2006 Index of Relative Socio-Economic Disadvantage (IRSED) quintiles at the  
25  
26 242 postcode level. The IRSED was created by the Australian Bureau of Statistics to  
27  
28 243 compare social and economic disadvantage across geographical areas in Australia.  
29  
30 244 The index is derived from the 2006 Census variables such as income, educational  
31  
32 245 attainment, unemployment, and people working in unskilled occupations<sup>32</sup>.

33  
34  
35 246 We also included physical functioning at baseline (measured using the Medical  
36  
37 247 Outcomes Study (MOS) Physical Functioning Scale; it ranges from 0 to 100 and was  
38  
39 248 categorised into no limitation (100), minor limitation (95-99), moderate limitation (85-  
40  
41 249 94), or severe limitation (0-84))<sup>33</sup>, psychological distress at baseline (Kessler-10  
42  
43 250 (K10); a K10 score of  $\geq 22$  reflects high or very high psychological distress<sup>34</sup>) and  
44  
45 251 body mass index (BMI) at baseline as potential covariates.

46  
47  
48  
49  
50  
51 252 As several studies have reported the beneficial effect of greenspace on mental  
52  
53 253 health<sup>35-37</sup> And that poor mental health can impact on physical activity<sup>38-40</sup>, we also  
54  
55 254 tested whether psychological distress at baseline could be a potential mediator  
56  
57  
58  
59  
60



1  
2  
3 255 between neighbourhood greenspace at baseline and changes in physical activity at  
4  
5 256 follow-up (see DAG Figure 2).  
6  
7

8 257 Similarly, we also tested for BMI reported at baseline as another potential mediator  
9  
10 258 between neighbourhood greenspace at baseline and changes in physical activity at  
11  
12 259 follow-up. Increased greenspace has been associated with reduced weight<sup>41</sup>, less  
13  
14 260 weight gain<sup>42</sup>, and people are less likely to be obese in greener areas<sup>43</sup>. Moreover,  
15  
16 261 people who are overweight or obese reported spending less time in physical activity  
17  
18 262 than those who are normal-weight<sup>44-46</sup>.  
19  
20  
21

22  
23 263 Figure 2: Directed acyclic graph of the relationship between neighbourhood  
24 264 greenspace and physical activity and sitting.  
25 265  
26  
27  
28 266  
29

### 30 267 *Statistical analysis*

31  
32  
33 268 The Kruskal-Wallis test was used to compare continuous baseline lifestyle variables  
34  
35 269 between the two T2D groups. Separate regression models were used to examine the  
36  
37 270 association between neighbourhood greenspace access and change in outcome  
38  
39 271 variables (in MVPA, walking, and sitting). To adjust for correlation between  
40  
41 272 participants within local government areas (LGA), generalised estimating equations  
42  
43 273 (GEE) model was applied. Assuming no specific order between observations in the  
44  
45 274 same LGA, the compound-symmetric correlation structure was used. BMI and  
46  
47 275 psychological distress were tested for mediation between neighbourhood  
48  
49 276 greenspace and physical activity. There were no associations between  
50  
51 277 neighbourhood greenspace and BMI and psychological distress. However, BMI, but  
52  
53 278 not psychological distress, was associated with changes in the outcome variables  
54  
55 279 and therefore included in the final models. Psychological distress was not included in  
56  
57  
58  
59  
60

1  
2  
3 280 the final models. The final set of variables included in the final models was age,  
4  
5 281 gender, educational attainment, level of physical functional limitation, IRSED, BMI at  
6  
7 282 baseline, and duration of T2D diagnosis (New T2D group only), follow-up time and  
8  
9 283 the baseline value of each outcome in specific models. To examine whether the  
10  
11 284 association between greenspace and change in outcome variables modified by the  
12  
13 285 presence of type 2 diabetes, a two-way interaction between the status of T2D (New  
14  
15 286 T2D and No type 2 diabetes) and percentage of greenspace was explored. We then  
16  
17 287 developed regression models, stratified by the presence of type 2 diabetes.  
18  
19 288 Predicted values of change and associated 95% confidence intervals (CIs) were  
20  
21 289 reported. To adjust for multiple comparison, Bonferroni method were used in the final  
22  
23 290 models. Statistical analyses were conducted using SAS version 9.4 (SAS Institute,  
24  
25 291 Cary, NC).

292

## 293 Patient and Public Involvement

294 In the 45 and Up Study, participants completed a baseline questionnaire and  
295 have provided informed consent for long-term follow-up and for the use of  
296 their data for research purposes. However, patients and the public were not  
297 involved in the design of this study.

298

## 299 Results

1  
2  
3 300 Of the 24,220 participants living in Sydney Statistical Division, 628 were excluded  
4  
5 301 due to inconsistent reporting between baseline and follow-up surveys, 1,498 were  
6  
7 302 excluded due to reporting T2D at both baseline and follow-up and an additional  
8  
9  
10 303 4,000 were excluded because of severe level of physical function, making physical  
11  
12 304 activity challenging or infeasible, leaving 18,094 participants in the analytical sample  
13  
14  
15 305 (Figure 3).

16  
17 306 Figure 3: Flow chart of sample selection  
18  
19 307

20  
21  
22 308 Of the 18,094 participants, 260 (1.4%) reported T2D in the follow-up survey but not  
23  
24 309 in the baseline survey (New type 2 diabetes) whereas 17,834 (98.6%) participants  
25  
26 310 did not report T2D at both baseline and follow-up (No type 2 diabetes). The average  
27  
28 311 duration of time since diagnosis was  $1.8 \pm 1.1$  years (median=1.7 years). More than  
29  
30 312 half of all the participants were female (52.0%) and the average age of participants  
31  
32  
33 313 was  $59.5 \pm 9.6$  years. The majority of participants were born in an English speaking  
34  
35  
36 314 country (85.2%) and about one-quarter had not completed high school education  
37  
38 315 (Table 1).

39  
40  
41 316 Table 1 shows changes in outcome variables at follow-up by baseline  
42  
43 317 sociodemographic characteristics and access to greenspace. There were significant  
44  
45 318 associations of age group, IRSED, physical functional limitation, BMI, with change in  
46  
47  
48 319 the amount of walking and MVPA. Significant associations were also found between  
49  
50 320 gender and change in the amount of walking and sitting. Educational attainment was  
51  
52 321 significantly associated with a change in sitting time. There were no significant  
53  
54  
55 322 associations between greenspace and changes in MVPA, walking and sitting.

56  
57  
58 323  
59 324  
60

325 Table 1: Changes in outcome variables at follow-up by baseline characteristics

|                                                    | n      | Change in MVPA <sup>1</sup><br>(hours/week) |                |         | Change in walking <sup>2</sup><br>(hours/week) |               |         | Change in sitting <sup>3</sup><br>(hours/week) |                 |         |
|----------------------------------------------------|--------|---------------------------------------------|----------------|---------|------------------------------------------------|---------------|---------|------------------------------------------------|-----------------|---------|
|                                                    |        | Mean                                        | 95% CI         | p-value | Mean                                           | 95% CI        | p-value | Mean                                           | 95% CI          | p-value |
| Gender                                             |        |                                             |                | 0.070   |                                                |               | 0.018   |                                                |                 | 0.013   |
| Male                                               | 8,677  | 0.20                                        | 0.04 to 0.37   |         | 0.14                                           | 0.07 to 0.21  |         | -0.47                                          | -0.53 to -0.40  |         |
| Female                                             | 9,417  | 0.42                                        | 0.25 to 0.59   |         | 0.27                                           | 0.19 to 0.34  |         | -0.59                                          | -0.65 to -0.52  |         |
| Age (years)                                        |        |                                             |                | <0.0001 |                                                |               | <0.0001 |                                                |                 | <0.0001 |
| 45-55                                              | 6,581  | 0.19                                        | 0.01 to 0.38   |         | 0.07                                           | -0.01 to 0.15 |         | -0.17                                          | -0.24 to -0.10  |         |
| >55-65                                             | 5,960  | 0.76                                        | 0.56 to 0.96   |         | 0.38                                           | 0.30 to 0.47  |         | -0.72                                          | -0.80 to -0.64  |         |
| >65                                                | 5,553  | -0.12                                       | -0.36 to 0.12  |         | 0.17                                           | 0.06 to 0.27  |         | -0.86                                          | -0.95 to -0.77  |         |
| Country of birth (missing=146)                     |        |                                             |                | 0.082   |                                                |               | 0.164   |                                                |                 | 0.27    |
| English speaking countries                         | 15,282 | 0.37                                        | 0.24 to 0.49   |         | 0.22                                           | 0.16 to 0.28  |         | -0.51                                          | -0.56 to -0.47  |         |
| Europe                                             | 1,213  | 0.12                                        | -0.37 to 0.61  |         | 0.21                                           | -0.01 to 0.42 |         | -0.66                                          | -0.85 to -0.48  |         |
| Middle East                                        | 192    | -0.18                                       | -1.43 to 1.07  |         | -0.30                                          | -0.85 to 0.24 |         | -0.87                                          | -1.34 to -0.39  |         |
| Asia                                               | 825    | -0.42                                       | -0.97 to 0.14  |         | 0.01                                           | -0.24 to 0.25 |         | -0.57                                          | -0.78 to -0.36  |         |
| Other                                              | 438    | 0.22                                        | -0.54 to 0.97  |         | 0.18                                           | -0.15 to 0.51 |         | -0.41                                          | -0.70 to -0.11  |         |
| Highest level of education completed (missing=206) |        |                                             |                | 0.496   |                                                |               | 0.158   |                                                |                 | <0.0001 |
| University/TAFE <sup>5</sup>                       | 10,491 | 0.27                                        | 0.12 to 0.42   |         | 0.16                                           | 0.09 to 0.22  |         | -0.41                                          | -0.46 to -0.35  |         |
| High school                                        | 3,306  | 0.46                                        | 0.18 to 0.74   |         | 0.26                                           | 0.14 to 0.39  |         | -0.69                                          | -0.80 to -0.59  |         |
| Did not complete high school                       | 4,091  | 0.32                                        | 0.05 to 0.59   |         | 0.26                                           | 0.14 to 0.38  |         | -0.76                                          | -0.86 to -0.65  |         |
| IRSED                                              |        |                                             |                | 0.002   |                                                |               | 0.007   |                                                |                 | 0.123   |
| Most disadvantaged group                           | 3,449  | 0.39                                        | 0.22 to 0.55   |         | 0.23                                           | 0.16 to 0.30  |         | -0.50                                          | -0.57 to -0.44  |         |
| 2 <sup>nd</sup> disadvantaged group                | 3,345  | -0.06                                       | -0.45 to 0.33  |         | 0.01                                           | -0.17 to 0.18 |         | -0.69                                          | -0.84 to -0.54  |         |
| 3 <sup>rd</sup> disadvantaged group                | 3,763  | -0.31                                       | -0.69 to 0.07  |         | 0.03                                           | -0.14 to 0.20 |         | -0.55                                          | -0.69 to -0.40  |         |
| 4 <sup>th</sup> disadvantaged group                | 3,683  | 0.51                                        | 0.28 to 0.74   |         | 0.30                                           | 0.20 to 0.41  |         | -0.49                                          | -0.57 to -0.40  |         |
| Least disadvantaged group                          | 3,843  | 0.37                                        | -0.16 to 0.89  |         | 0.10                                           | -0.13 to 0.33 |         | -0.64                                          | -0.84 to -0.44  |         |
| Physical functional limitation (missing=3,123)     |        |                                             |                | <0.0001 |                                                |               | <0.001  |                                                |                 | 0.301   |
| Moderate                                           | 3,546  | -0.48                                       | -0.73 to -0.24 |         | 0.01                                           | -0.09 to 0.12 |         | -0.58                                          | -0.68 to -0.49  |         |
| Minor                                              | 3,768  | 0.10                                        | -0.13 to 0.33  |         | 0.21                                           | 0.11 to 0.32  |         | -0.53                                          | -0.62 to -0.44  |         |
| None                                               | 7,405  | 0.80                                        | 0.63 to 0.96   |         | 0.29                                           | 0.21 to 0.36  |         | -0.50                                          | -0.56 to -0.43  |         |
| Psychological distress (missing=355)               |        |                                             |                | 0.595   |                                                |               | 0.716   |                                                |                 | 0.415   |
| No                                                 | 16,900 | 0.32                                        | 0.20 to 0.44   |         | 0.20                                           | 0.15 to 0.25  |         | -0.52                                          | -0.57 to -0.47  |         |
| Yes                                                | 812    | 0.16                                        | -0.43 to 0.74  |         | 0.25                                           | -0.01 to 0.51 |         | -0.62                                          | -0.85 to -0.39  |         |
| Body Mass Index (missing=857)                      |        |                                             |                | <0.0001 |                                                |               | <0.0001 |                                                |                 | <0.0001 |
| Under weight                                       | 244    | 0.30                                        | -0.74 to 1.34  |         | 0.20                                           | -0.26 to 0.66 |         | -0.54                                          | -0.94 to -0.14  |         |
| Healthy weight                                     | 7,541  | 0.69                                        | 0.51 to 0.86   |         | 0.33                                           | 0.26 to 0.41  |         | -0.63                                          | -0.69 to -0.56  |         |
| Overweight                                         | 6,852  | 0.25                                        | 0.07 to 0.44   |         | 0.21                                           | 0.13 to 0.29  |         | -0.51                                          | -0.58 to -0.44  |         |
| Obese                                              | 2,547  | -0.83                                       | -1.15 to -0.50 |         | 0.28                                           | 0.13 to 0.42  |         | -0.22                                          | -0.34 to -0.09  |         |
| Greenspace within 500m                             |        |                                             |                | 0.476   |                                                |               | 0.354   |                                                |                 | 0.715   |
| 0-5%                                               | 13,762 | 0.34                                        | 0.21 to 0.48   |         | 0.19                                           | 0.13 to 0.25  |         | -0.51                                          | -0.56 to -0.46  |         |
| >5-10%                                             | 2,657  | 0.16                                        | -0.14 to 0.47  |         | 0.25                                           | 0.12 to 0.39  |         | -0.55                                          | -0.67 to -0.43  |         |
| >10-15%                                            | 1,341  | 0.19                                        | -0.24 to 0.63  |         | 0.23                                           | 0.03 to 0.42  |         | -0.61                                          | -0.78 to -0.44  |         |
| >15%                                               | 334    | 0.61                                        | -0.26 to 1.49  |         | 0.28                                           | -0.11 to 0.66 |         | -0.50                                          | -0.83 to -0.17  |         |
| Greenspace within 1km                              |        |                                             |                | 0.224   |                                                |               | 0.128   |                                                |                 | 0.951   |
| 0-5%                                               | 10,948 | 0.37                                        | 0.22 to 0.52   |         | 0.20                                           | 0.14 to 0.27  |         | -0.52                                          | -0.58 to -0.46  |         |
| >5-10%                                             | 4,843  | 0.12                                        | -0.11 to 0.35  |         | 0.15                                           | 0.05 to 0.25  |         | -0.52                                          | -0.61 to -0.43  |         |
| >10-15%                                            | 1,497  | 0.29                                        | -0.13 to 0.70  |         | 0.31                                           | 0.13 to 0.49  |         | -0.59                                          | -0.75 to -0.43  |         |
| >15-20%                                            | 451    | 0.52                                        | -0.22 to 1.26  |         | 0.08                                           | -0.25 to 0.40 |         | -0.52                                          | -0.81 to -0.23  |         |
| >20%                                               | 355    | 0.94                                        | 0.10 to 1.79   |         | 0.59                                           | 0.22 to 0.96  |         | -0.47                                          | -0.79 to -0.15  |         |
| Greenspace within 2km                              |        |                                             |                | 0.477   |                                                |               | 0.682   |                                                |                 | 0.221   |
| 0-5%                                               | 7,789  | 0.33                                        | 0.15 to 0.51   |         | 0.16                                           | 0.08 to 0.24  |         | -0.55                                          | -0.62 to -0.48  |         |
| >5-10%                                             | 6,980  | 0.21                                        | 0.02 to 0.40   |         | 0.23                                           | 0.15 to 0.32  |         | -0.50                                          | -0.57 to -0.43  |         |
| >10-15%                                            | 2,157  | 0.44                                        | 0.10 to 0.78   |         | 0.25                                           | 0.10 to 0.40  |         | -0.53                                          | -0.65 to -0.40  |         |
| >15-20%                                            | 688    | 0.46                                        | -0.14 to 1.06  |         | 0.14                                           | -0.13 to 0.40 |         | -0.36                                          | -0.59 to -0.13  |         |
| >20%                                               | 480    | 0.75                                        | 0.03 to 1.48   |         | 0.36                                           | 0.04 to 0.68  |         | -0.77                                          | --1.04 to -0.49 |         |

326 <sup>1</sup>Mean adjusted for baseline amount of time spent on MVPA per week.327 <sup>2</sup>Mean adjusted for baseline amount of time spent on walking per week.

328 <sup>3</sup>Mean adjusted for baseline amount of time spent on sitting per week.

### 329 Baseline correlates of the outcomes

330  
331 Table 2 presents the outcome variables at baseline by T2D group. The amount of  
332 time spent on MVPA at baseline was significantly higher among the “No type 2  
333 diabetes” group. There were no significant differences in the amount of time spent on  
334 walking and sitting between New T2D and No type 2 diabetes.

335 Table 2: Outcome variables at baseline by T2D status

|                         | New type 2 diabetes |      |                        | No type 2 diabetes |      |                        | Kruskal-Wallis,<br>p-value |
|-------------------------|---------------------|------|------------------------|--------------------|------|------------------------|----------------------------|
|                         | Median              | Mean | Interquartile<br>range | Median             | Mean | Interquartile<br>range |                            |
| MVPA (hours/week)       | 6.00                | 8.13 | 2.52-11.67             | 7.25               | 9.13 | 3.67-13.00             | 0.006                      |
| Walking<br>(hours/week) | 2.00                | 2.99 | 0.50-4.00              | 2.00               | 2.95 | 0.83-4.00              | 0.538                      |
| Sitting (hours/week)    | 5.00                | 5.90 | 4.00-8.00              | 5.00               | 5.83 | 4.00-8.00              | 0.534                      |

336  
337 Although the interactions between access to greenspace for each buffer size and  
338 status of T2D was not statistically significant for each outcome variable except for  
339 the changes in MVPA with percentage of greenspace within 2km (p=0.039), the  
340 differences in trends between status of T2D were apparent as shown in Figure 4.

### 342 Greenspace and outcomes by diagnosis of type 2 diabetes

343 Figure 4 presents marginal mean changes in the amount of walking, MVPA and  
344 sitting, and associated 95% CI by proportion of greenspace. A change in the  
345 outcome variable of greater than zero indicates an increase in that outcome at the  
346 follow-up study relative to the baseline study. Regardless of diabetes status and  
347 buffer size, there were no associations between percentage of greenspace and  
348 changes in amount of walking and sitting. For example, the 95% CI of changes in the

1  
2  
3 349 amount of walking were overlapping between each category of greenspace  
4  
5 350 regardless of buffer size. Although there were no significant changes in amount of  
6  
7  
8 351 walking with the percentage of greenspace, increasing trends were apparent among  
9  
10 352 New T2D which peaked at >15-20% of greenspace, whereas fairly stable trends  
11  
12 353 were found among No type 2 diabetes. Similar trends were also found for changes in  
13  
14  
15 354 the amount of MVPA.

16  
17  
18 355  
19  
20  
21 356 Among New type 2 diabetes, there was no significant association between the  
22  
23 357 percentage of greenspace within 2km buffer and changes in amount of MVPA.  
24  
25 358 However, increasing trend was apparent with the peak at >15-20% of greenspace.  
26  
27 359 Among No type 2 diabetes, the changes in amount of MVPA remained fairly stable  
28  
29  
30 360 with increasing percentage of greenspace (Figure 4).  
31  
32

33 361  
34  
35  
36 362 For changes in sitting time, there were no significant associations with percentage of  
37  
38 363 greenspace regardless of buffer size. Among New type 2 diabetes, the changes in  
39  
40 364 amount of sitting decreased at percentage of greenspace >10%. Among No type 2  
41  
42 365 diabetes, the changes in amount of sitting significantly decreased at follow-up and  
43  
44  
45 366 remained stable with increasing proportion of greenspace.  
46  
47

48  
49 367  
50

51  
52 368 Figure 4: Change (with 95% CI) in outcomes by proportion of greenspace (Bonferroni  
53 369 method was applied for multiple comparison)

54 370

55 371

56  
57  
58 372 Discussion  
59  
60

1  
2  
3 373 This is the first study to explore environmental influences on the behaviours of  
4  
5 374 people who transition into living with type 2 diabetes. Overall, we found that there  
6  
7  
8 375 was a lack of association between access to greenspace at baseline and change in  
9  
10 376 walking, MVPA, and sitting time. We found no statistically significant interactions  
11  
12 377 between access to greenspace and status of T2D for each outcome variable, except  
13  
14 378 for the changes in MVPA with percentage of greenspace within 2km. Although no  
15  
16 379 significant interactions were found, possibly due to the small sample size of those  
17  
18 380 with newly diagnosed type 2 diabetes, the magnitude of changes in walking and  
19  
20 381 MVPA increased as percentage of greenspace increased among New T2D while  
21  
22 382 remain fairly stable among No type 2 diabetes. There was no significant association  
23  
24 383 between greenspace and sitting time with fairly stable trends among both New T2D  
25  
26 384 and No type 2 diabetes.  
27  
28  
29  
30

31 385  
32  
33  
34 386 Among participants with newly diagnosed type 2 diabetes, there were gradual  
35  
36 387 increases in walking and MVPA with increasing proportion of greenspace within 1km  
37  
38 388 and 2km buffers. However, these increases in walking and MVPA were no longer  
39  
40 389 evident with >20% greenspace. This may be because around half of the participants  
41  
42 390 with more than 20% of greenspace within a 2km buffer (around 3% of the total  
43  
44 391 sample) live near larger greenspace (area > 1km<sup>2</sup>). These large greenspaces are  
45  
46 392 mainly national parks and nature reserve that may have limited public access points.  
47  
48 393 These areas are often located in suburbs on the outskirts of the city with minimal  
49  
50 394 pedestrian or other infrastructure to facilitate the regular use of greenspace for  
51  
52 395 physical activity<sup>47</sup>. Francis et al suggested that the type and functionality of the  
53  
54 396 greenspace may be a salient factor in addition to quantity<sup>48</sup>.  
55  
56  
57  
58  
59  
60 397



1  
2  
3 398 Furthermore, the lack of association found between greenspace and walking and  
4  
5 399 MVPA may be due to the increased participation in fitness activities taken place  
6  
7 400 outside of neighbourhood greenspace. Such fitness activities include aerobics,  
8  
9 401 fitness, gym activities, Pilates, weight training and yoga.<sup>49</sup> In Australia, fitness centre  
10  
11 402 /gym activities is the second most popular physical recreational activity after  
12  
13 403 walking.<sup>50</sup> Similarly, a Dutch study<sup>15</sup> found no significant association between the  
14  
15 404 amount of greenspace within 1km radius of respondents' home and meeting the  
16  
17 405 Dutch public health recommendation for physical activity possibly due to a high  
18  
19 406 density of fitness centres and so that access to greenspace is not a necessary  
20  
21 407 condition for being physically active.<sup>51</sup>  
22  
23  
24  
25  
26 408

27  
28  
29 409 The weak associations between sitting and proportion of greenspace may be due to  
30  
31 410 the lack of detailed information on the setting and domains of sitting (home, car, work  
32  
33 411 or recreation environment). In the 45 and up study, only total sitting time was  
34  
35 412 measured at both baseline and follow-up. Self-reported total sitting time is subject to  
36  
37 413 substantial measurement errors and does not distinguish occupational and  
38  
39 414 transportation sitting from recreational sitting. Previous studies have found that  
40  
41 415 correlates of sitting differed considerably by domain of sitting.<sup>52</sup> Sperlich et al found  
42  
43 416 a weak association between sitting duration and access to parks and recreation  
44  
45 417 facilities<sup>53</sup> and suggest that research investigating association between sitting time  
46  
47 418 and environment should consider the diverse domains of sitting.<sup>53</sup>  
48  
49  
50  
51

52 419  
53  
54  
55 420 Overall, the association between proportion of greenspace and change in physical  
56  
57 421 activity appeared more prominent in New T2D than No type 2 diabetes. These  
58  
59 422 findings suggest that greenspace may have more motivating effect on physical  
60



1  
2  
3 423 activity among those newly diagnosed with type 2 diabetes. Diabetes Australia  
4  
5 424 recommends people with T2D start with at least thirty minutes of moderate physical  
6  
7 425 activity every day or between sixty and ninety minutes every day if they are trying to  
8  
9 426 lose weight.<sup>54</sup> However, it appears that proximity to greenspace alone may not be  
10  
11 427 sufficient to meet Diabetes Australia recommendations for those with newly  
12  
13 428 diagnosed type 2 diabetes.  
14  
15  
16

17 429  
18  
19  
20 430  
21  
22  
23 431 The strengths of this study include a prospective design and a large population-  
24  
25 432 based cohort study. Although diagnostic or clinical information was not available to  
26  
27 433 confirm the diagnosis of T2D among participants, in this sample self-reported  
28  
29 434 diagnosis of T2D has high sensitivity and specificity compared to hospital  
30  
31 435 administrative data collections.<sup>31</sup> Having outcome measures at two time points only  
32  
33 436 over two to five years has limited our ability to track changes in lifestyle behaviours  
34  
35 437 over longer periods of time.  
36  
37  
38

39 438  
40  
41  
42 439 A few additional limitations apply. We were not able to differentiate between different  
43  
44 440 domains of MVPA and sitting, such as recreational, transport or occupational  
45  
46 441 physical activity and sitting. We also don't know whether each activity took place  
47  
48 442 within the local greenspace. Further, greenspace included state forests and national  
49  
50 443 parks which may or may not be conducive to walking and MVPA as urban parks and  
51  
52 444 trails. We also could not categorise greenspace into more usable categories, for  
53  
54 445 example, sports fields, bushland, presence of picnic facilities, etc., nor do we have  
55  
56 446 access to the quality of the greenspace. Moreover, although we adjusted for a  
57  
58  
59  
60

1  
2  
3 447 number of important potential confounders, there may yet be some residual  
4  
5 448 confounding. However, we share this limitation with most other published studies on  
6  
7  
8 449 neighbourhoods and health.  
9

10 450

## 11 451 Conclusion

12  
13  
14  
15 452 This study indicates that neighbourhood greenspace is related to active lifestyles  
16  
17 453 only to a very limited extent among people with newly diagnosed type 2 diabetes.  
18  
19 454 This is particularly so when there is moderate amount of greenspace (15-20% of the  
20  
21  
22 455 neighbourhood). Future studies should consider including more comprehensive  
23  
24 456 environmental measures about greenspace and other environmental attributes (e.g.,  
25  
26 457 recreational facilities), more specific measures of physical activity and sedentary  
27  
28 458 behaviour, such as the domain and location of each activity, and the more follow-up  
29  
30 459 measures over longer period of time.  
31  
32

33 460

## 34 461 Ethics approval

35  
36  
37 462 The baseline 45 and Up Study and the SEEF Study were approved by the University  
38  
39 463 of New South Wales Human Research Ethics Committee and the University of  
40  
41 464 Sydney Human Research Ethics Committee respectively.  
42  
43  
44

45 465

## 46 466 Acknowledgements

47  
48 467 This research was completed using data collected through the 45 and Up Study  
49  
50 468 ([www.saxinstitute.org.au](http://www.saxinstitute.org.au)). The 45 and Up Study is managed by the Sax Institute in  
51  
52 469 collaboration with major partner Cancer Council NSW; and partners: the National  
53  
54 470 Heart Foundation of Australia (NSW Division); NSW Ministry of Health; NSW

1  
2  
3 471 Government Family & Community Services – Carers, Ageing and Disability  
4  
5 472 Inclusion; and the Australian Red Cross Blood Service. We thank the many  
6  
7 473 thousands of people participating in the 45 and Up Study.  
8  
9

10  
11 474

#### 12 13 475 Contributors

14  
15  
16 476 Shanley Chong participated in the design of the study, carried out the statistical  
17  
18 477 analyses and drafted the manuscript. Soumya Mazumdar participated in the design  
19  
20 478 of the study, helped draft the manuscript, helped with the interpretation and revised  
21  
22 479 the manuscript. Ding Ding helped draft the manuscript, helped with the interpretation  
23  
24 480 of the data and revised the manuscript. Geoff Morgan, Elizabeth Comino and Adrian  
25  
26 481 Bauman helped with the interpretation of the data and revised the manuscript. Bin  
27  
28 482 Jalaludin supervised the study, helped draft the manuscript, helped with the  
29  
30 483 interpretation of the data and revised the manuscript.  
31  
32  
33  
34

35 484

#### 36 37 38 485 Funding

39  
40 486 The research was funded from a NH&MRC Preventative Healthcare and  
41  
42 487 Strengthening Australia's Social and Economic Fabric Program Grant.  
43  
44  
45

46 488

#### 47 48 489 Competing interests

49  
50  
51 490 None declared.  
52  
53

54 491

#### 55 56 57 492 Ethics approval

58  
59  
60

1  
2  
3 493 The 45 and Up Study was granted ethical approval by the NSW Population & Health  
4  
5 494 Services Research Ethic Committee (reference HREC/15/CIOHS/4) and the Cancer  
6  
7  
8 495 Institute NSW (reference 2015/02/575).  
9

10 496

11  
12  
13 497 Data sharing statement

14  
15  
16 498 This research was completed using data collected through the 45 and Up Study  
17  
18 499 (www.saxinstitute.org.au).  
19

20  
21 500 References

- 22  
23  
24 501 1. Mulnier HE, Seaman HE, Raleigh VS, et al. Mortality in people with type 2 diabetes in the UK.  
25 502 *Diabetic medicine : a journal of the British Diabetic Association* 2006;23(5):516-21. doi:  
26 503 10.1111/j.1464-5491.2006.01838.x [published Online First: 2006/05/10]  
27 504 2. Hu G, Jouslahti P, Barengo NC. Physical activity, cardiovascular risk factors, and mortality among  
28 505 Finnish adults with diabetes. *Diabetes Care* 2005;28:799-805.  
29 506 3. Baker IDI Heart & Diabetes Institute. Diabetes: the silent pandemic and its impact on Australia  
30 507 Australia: Baker IDI Heart and Diabetes Institute, 2012.  
31 508 4. Norris SL, Zhang X, Avenell A, et al. Long-term effectiveness of lifestyle and behavioral weight loss  
32 509 interventions in adults with type 2 diabetes: a meta-analysis. *The American journal of*  
33 510 *medicine* 2004;117(10):762-74. doi: 10.1016/j.amjmed.2004.05.024 [published Online First:  
34 511 2004/11/16]  
35 512 5. Klein S, Sheard NF, Pi-Sunyer X, et al. Weight management through lifestyle modification for the  
36 513 prevention and management of type 2 diabetes: rationale and strategies. A statement of the  
37 514 American diabetes association, the North American association for the study of obesity, and  
38 515 the American society for clinical nutrition. *American journal of clinical nutrition*  
39 516 2004;80(2):257-63.  
40 517 6. Tuomileho J, Lindstrom J, Eriksson JG, et al. Prevention of type 2 diabetes mellitus by changes in  
41 518 lifestyle among subjects with impaired glucose tolerance. *New England Journal of Medicine*  
42 519 2001;344:1343-50.  
43 520 7. Castaneda C, Layne JE, Munoz-Orians L. A randomised controlled trial of resistance exercise  
44 521 training to improve glycemic control in older adults with type 2 diabetes. *Diabetes Care*  
45 522 2002;25:2335-41.  
46 523 8. Australian Diabetes Council. 10 ways to manage diabetes. NSW, Australia: Australian Diabetes  
47 524 Council, 2010.  
48 525 9. Health Canada. Diabetes in Canada: National Statistics and Opportunities for Improved  
49 526 Surveillance, Prevention and Control. Ottawa, Ontario, 1999:1-69.  
50 527 10. Nelson KM, Reiber G, Boyko EJ. Diet and Exercise Among Adults With Type 2 Diabetes. *Findings*  
51 528 *from the Third National Health and Nutrition Examination Survey (NHANES III)*  
52 529 2002;25(10):1722-28. doi: 10.2337/diacare.25.10.1722  
53 530 11. Bauman AE, Reis RS, Sallis JF, et al. Correlates of physical activity: why are some people physically  
54 531 active and others not? *The Lancet* 2012;380(9838):258-71. doi: 10.1016/S0140-  
55 532 6736(12)60735-1  
56  
57  
58  
59  
60

- 1  
2  
3 533 12. Ding D, Gebel K. Built environment, physical activity, and obesity: What have we learned from  
4 534 reviewing the literature? *Health Place* 2012;18(1):100-05. doi:  
5 535 <https://doi.org/10.1016/j.healthplace.2011.08.021>  
6 536 13. Sundquist K, Eriksson U, Mezuk B, et al. Neighborhood walkability, deprivation and incidence of  
7 537 type 2 diabetes: a population-based study on 512,061 Swedish adults. *Health Place*  
8 538 2015;31:24-30. doi: 10.1016/j.healthplace.2014.10.011 [published Online First: 2014/12/03]  
9 539 14. Thomas N, Alder E, Leese GP. Barriers to physical activity in patients with diabetes. *Postgraduate*  
10 540 *Medical Journal* 2004;80(943):287-91.  
11 541 15. Maas J, Verheij R, Spreeuwenberg P, et al. Physical activity as a possible mechanism behind the  
12 542 relationship between green space and health: A multilevel analysis. *BMC Public Health*  
13 543 2008;8(1):206.  
14 544 16. Hillsdon M, Panter J, Foster C, et al. The relationship between access and quality of urban green  
15 545 space with population physical activity. *Public Health* 2006;120(12):1127-32. doi:  
16 546 10.1016/j.puhe.2006.10.007 [published Online First: 2006/10/28]  
17 547 17. Bedimo-Rung AL, Mowen AJ, Cohen DA. The significance of parks to physical activity and public  
18 548 health: a conceptual model. *Am J Prev Med* 2005;28 doi: 10.1016/j.amepre.2004.10.024  
19 549 18. Greenspace Scotland. Health impact assessment of greenspace: a guide. In: scotland g, ed.  
20 550 Stirling, 2008.  
21 551 19. Coombes E, Jones AP, Hillsdon M. The relationship of physical activity and overweight with  
22 552 objectively measured green space accessibility and use. *Social Science and Medicine*  
23 553 2010;70(6):816-22.  
24 554 20. McCormack GR, Rock M, Toohey AM, et al. Characteristics of urban parks associated with park  
25 555 use and physical activity: a review of qualitative research. *Health Place* 2010;16:712-26.  
26 556 21. Sigal RJ, Kenny GP, Wasserman DH, et al. Physical Activity/Exercise and Type 2 Diabetes. A  
27 557 *consensus statement from the American Diabetes Association* 2006;29(6):1433-38. doi:  
28 558 10.2337/dc06-9910  
29 559 22. Schneider KL, Andrews C, Hovey KM, et al. Change in physical activity after a diabetes diagnosis:  
30 560 opportunity for intervention. *The official journal of the American College of Sports Medicine*  
31 561 2014;46(1):84-91.  
32 562 23. Penn L, Moffatt SM, White M. Participants' perspective on maintaining behaviour change: a  
33 563 qualitative study within the European Diabetes Prevention Study. *BMC Public Health*  
34 564 2008;8(235):1-11.  
35 565 24. Sax Institute. Guidelines for authors regarding technical review of 45 and Up Study papers 2015  
36 566 2015 [Available from: [http://saxinstitute.org.au/wp-content/uploads/Guidelines-for-](http://saxinstitute.org.au/wp-content/uploads/Guidelines-for-authors-regarding-technical-review-of-45-and-Up-Study-papers.pdf)  
37 567 [authors-regarding-technical-review-of-45-and-Up-Study-papers.pdf](http://saxinstitute.org.au/wp-content/uploads/Guidelines-for-authors-regarding-technical-review-of-45-and-Up-Study-papers.pdf) accessed 11th January,  
38 568 2016 2016.  
39 569 25. Feeney K. NSW Walking Strategy. Literature Review. Australia: AECOM Australia Pty Ltd, 2011.  
40 570 26. Ding D, Rogers K, van der Ploeg H, et al. Traditional and Emerging Lifestyle Risk Behaviors and All-  
41 571 Cause Mortality in Middle-Aged and Older Adults: Evidence from a Large Population-Based  
42 572 Australian Cohort. *PLOS Medicine* 2015;12(12):e1001917. doi:  
43 573 10.1371/journal.pmed.1001917  
44 574 27. Australian Institute of Health and Welfare. The Active Australia Survey: a guide and manual for  
45 575 implementation, analysis and reporting. Canberra: Australian Institute of Health and Welfare  
46 576 (AIHW), 2003.  
47 577 28. Brown WJ, Trost SG, Bauman A, et al. Test-retest reliability of four physical activity measures  
48 578 used in population surveys. *Journal of science and medicine in sport / Sports Medicine*  
49 579 *Australia* 2004;7(2):205-15. [published Online First: 2004/09/15]  
50 580 29. Heesch KC, Hill RL, van Uffelen JG, et al. Are Active Australia physical activity questions valid for  
51 581 older adults? *Journal of science and medicine in sport / Sports Medicine Australia*  
52 582 2011;14(3):233-7. doi: 10.1016/j.jsams.2010.11.004 [published Online First: 2011/02/01]  
53  
54  
55  
56  
57  
58  
59  
60

- 1  
2  
3 583 30. Bauman A. TRENDS IN EXERCISE PREVALENCE IN AUSTRALIA. *Community Health Studies*  
4 584 1987;11(3):190-96. doi: 10.1111/j.1753-6405.1987.tb00005.x
- 5 585 31. Comino EJ, Tran DT, Haas M, et al. Validating self-report of diabetes use by participants in the 45  
6 586 and Up Study: a record linkage study. *BMC Health Serv Res* 2013;13:481. doi: 10.1186/1472-  
7 587 6963-13-481 [published Online First: 2013/11/20]
- 8 588 32. ABS. National Health Survey: Summary or results, Australia 2004-05. Canberra, 2006.
- 9 589 33. Stewart. A, Kamberg. CJ. Measuring functioning and well-being: The Medical Outcomes Study  
10 590 approach. . North Carolina: Duke University 1992.
- 11 591 34. Brooks RT, Beard J, Steel Z. Factor structure and interpretation of the K10. *Psychol Assess*  
12 592 2006;18(1):62-70. doi: 10.1037/1040-3590.18.1.62 [published Online First: 2006/04/06]
- 13 593 35. Grahn P, Stigsdotter UA. Landscape planning and stress. *Urban Forestry & Urban Greening*  
14 594 2003;2(1-18)
- 15 595 36. Sugiyama T, Thompson C. Associations between characteristics of neighbourhood open space  
16 596 and older people's walking. *Urban Forestry & Urban Greening* 2008;7:41-51.
- 17 597 37. Wood L, Hooper P, Foster S, et al. Public green spaces and positive mental health – investigating  
18 598 the relationship between access, quantity and types of parks and mental wellbeing. *Health*  
19 599 *Place* 2017;48:63-71. doi: <https://doi.org/10.1016/j.healthplace.2017.09.002>
- 20 600 38. Biddle SJH, Fox, K. R., Boutcher, S. H. Physical activity and psychological well-being. USA and  
21 601 Canada: Routledge 2000.
- 22 602 39. Kaplan MS, Newsom JT, McFarland BH, et al. Demographic and psychosocial correlates of  
23 603 physical activity in late life. *Am J Prev Med* 2001;21(4):306-12. doi:  
24 604 [https://doi.org/10.1016/S0749-3797\(01\)00364-6](https://doi.org/10.1016/S0749-3797(01)00364-6)
- 25 605 40. Lim K, Taylor L. Factors associated with physical activity among older people—a population-  
26 606 based study. *Prev Med* 2005;40(1):33-40. doi: <https://doi.org/10.1016/j.yjpm.2004.04.046>
- 27 607 41. Liu GC, Wilson JS, Qi R, et al. Green neighborhoods, food retail and childhood overweight:  
28 608 differences by population density. *American Journal of Health Promotion* 2007;21(Suppl  
29 609 4):317-25.
- 30 610 42. Bell JF, Wilson JS, Liu GC. Neighborhood Greenness and 2-Year Changes in Body Mass Index of  
31 611 Children and Youth. *Am J Prev Med* 2008;35(6):547-53. doi: 10.1016/j.amepre.2008.07.006
- 32 612 43. Ellaway A, Macintyre S, Bonnefoy X. Graffiti, greenery, and obesity in adults: secondary analysis  
33 613 of European cross sectional survey. *Br Med J* 2005;331 doi: 10.1136/bmj.38575.664549.F7
- 34 614 44. Davis JN, Hodges VA, Gillham MB. Physical Activity Compliance: Differences between  
35 615 Overweight/Obese and Normal-Weight Adults. 2006;14(12):2259-65. doi:  
36 616 10.1038/oby.2006.265
- 37 617 45. Cooper AR, Page A, Fox KR, et al. Physical activity patterns in normal, overweight and obese  
38 618 individuals using minute-by-minute accelerometry. *Eur J Clin Nutr* 2000;54(12):887-94.  
39 619 [published Online First: 2000/01/11]
- 40 620 46. Ekelund U, Åman J, Yngve A, et al. Physical activity but not energy expenditure is reduced in  
41 621 obese adolescents: a case-control study. *The American Journal of Clinical Nutrition*  
42 622 2002;76(5):935-41. doi: 10.1093/ajcn/76.5.935 %J The American Journal of Clinical Nutrition
- 43 623 47. Latham M. Urban Policy and the Environment in Western Sydney. *The Australian Quarterly*  
44 624 1992;64(1):71-81. doi: 10.2307/20635662
- 45 625 48. Francis J, Wood LJ, Knuiman M, et al. Quality or quantity? Exploring the relationship between  
46 626 Public Open Space attributes and mental health in Perth, Western Australia. *Soc Sci Med*  
47 627 2012;74(10):1570-77. doi: <http://dx.doi.org/10.1016/j.socscimed.2012.01.032>
- 48 628 49. ABS. Perspectives on Sport, May 2009 Canberra, Australia: Australian Bureau Statistics, 2009.
- 49 629 50. ABS. Participation in Sport and Physical Recreation 2009-10. Canberra: Australian Bureau of  
50 630 Statistics, 2016.
- 51 631 51. Maas J, Verheij RA, Spreeuwenberg P, et al. Physical activity as a possible mechanism behind the  
52 632 relationship between green space and health: a multilevel analysis. *BMC Public Health*  
53 633 2008;8:206. doi: 10.1186/1471-2458-8-206 [published Online First: 2008/06/12]



- 1  
2  
3 634 52. O'Donoghue G, Perchoux C, Mensah K, et al. A systematic review of correlates of sedentary  
4 635 behaviour in adults aged 18–65 years: a socio-ecological approach. *BMC Public Health*  
5 636 2016;16(1):163. doi: 10.1186/s12889-016-2841-3  
6 637 53. Wallmann-Sperlich B, Bucksch J, Hansen S, et al. Sitting time in Germany: an analysis of socio-  
7 638 demographic and environmental correlates. *BMC Public Health* 2013;13(196)  
8 639 54. Diabetes Australia. Physical activity & type 2 diabetes. *Talking diabetes A diabetes information*  
9 640 *series from Diabetes NSW* 2012; 27. [http://diabetesnsw.com.au/wp-](http://diabetesnsw.com.au/wp-content/uploads/2014/12/DA-27-Physical-health-and-diabetes.pdf)  
10 641 [content/uploads/2014/12/DA-27-Physical-health-and-diabetes.pdf](http://diabetesnsw.com.au/wp-content/uploads/2014/12/DA-27-Physical-health-and-diabetes.pdf) (accessed 20-12-2016).  
12  
13  
14  
15  
16  
17  
18  
19  
20  
21  
22  
23  
24  
25  
26  
27  
28  
29  
30  
31  
32  
33  
34  
35  
36  
37  
38  
39  
40  
41  
42  
43  
44  
45  
46  
47  
48  
49  
50  
51  
52  
53  
54  
55  
56  
57  
58  
59  
60

For peer review only

1  
2  
3  
4  
5  
6  
7  
8  
9  
10  
11  
12  
13  
14  
15  
16  
17  
18  
19  
20  
21  
22  
23  
24  
25  
26  
27  
28  
29  
30  
31  
32  
33  
34  
35  
36  
37  
38  
39  
40  
41  
42  
43  
44  
45  
46  
47  
48  
49  
50  
51  
52  
53  
54  
55  
56  
57  
58  
59  
60



31x17mm (600 x 600 DPI)



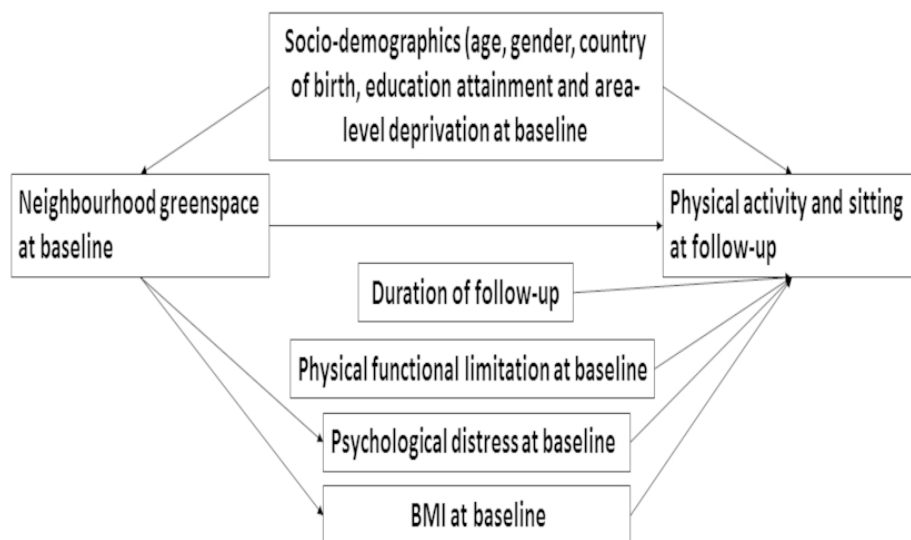

76x76mm (300 x 300 DPI)



51x39mm (300 x 300 DPI)

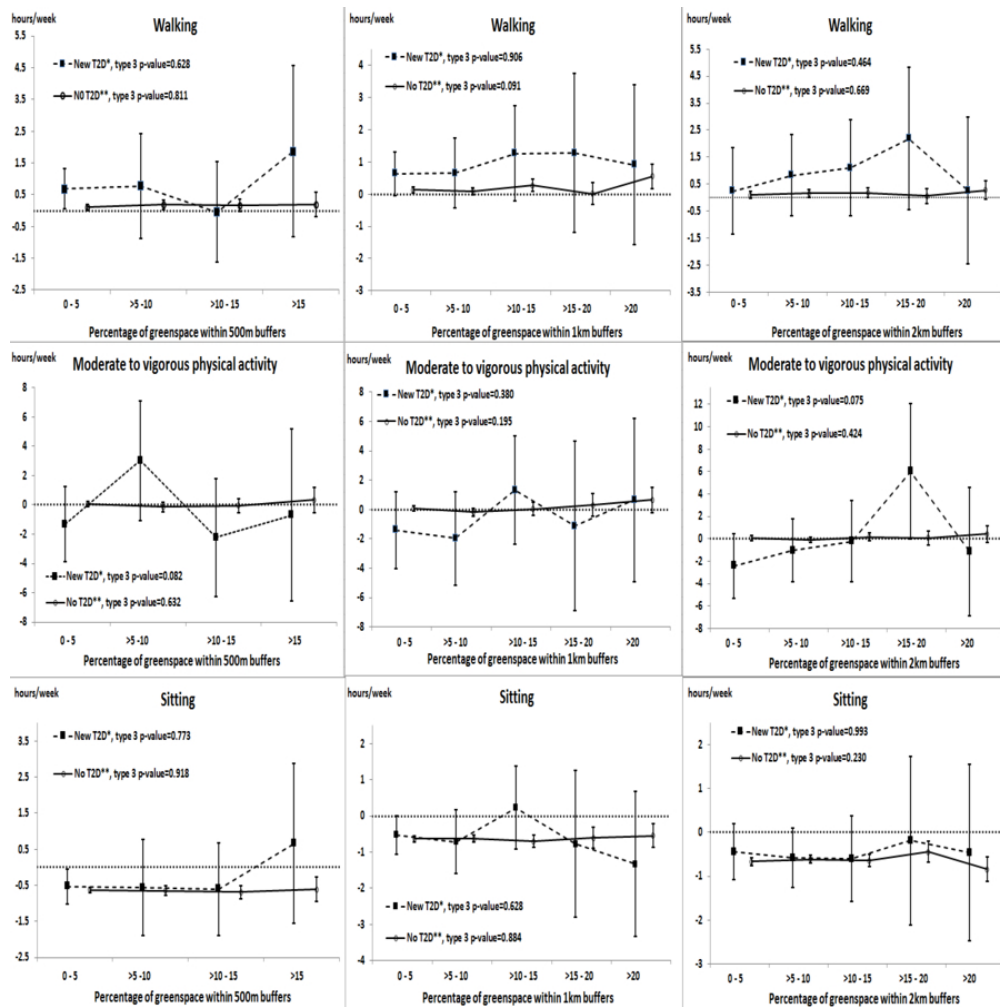

76x76mm (300 x 300 DPI)
